# Supplementary material for: The surface tension and cloud condensation nuclei (CCN) activation of sea spray aerosol particles
Source: Copernicus journal article supplement (doi:10.5194/acp-25-881-2025), 2025-01-22
Supplement: Supplementary file 1 [file acp-25-881-2025-supplement.pdf]

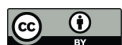

*Supplement of*

## **The surface tension and cloud condensation nuclei (CCN) activation of sea spray aerosol particles**

**Judith Kleinheins et al.**

*Correspondence to:* Judith Kleinheins ([judith.kleinheins@env.ethz.ch](mailto:judith.kleinheins@env.ethz.ch))

The copyright of individual parts of the supplement might differ from the article licence.

## Contents

|     |                                                                     |    |
|-----|---------------------------------------------------------------------|----|
| S1  | Influence of the Sigmoid parameter $d$                              | 2  |
| S2  | Computational flowchart for the quaternary Eberhart–Monolayer model | 3  |
| S3  | Comparison to surface tension data of small droplets                | 4  |
| S4  | Influence of solution non-ideality                                  | 5  |
| S5  | Influence of SDS dissociation                                       | 9  |
| S6  | Eberhart fit parameters of organic substances                       | 10 |
| S7  | Surface tension isotherms of atmospheric samples                    | 12 |
| S8  | Surface tension isotherms of the model compounds                    | 14 |
| S9  | Influence of salting-out                                            | 15 |
| S10 | Influence of SDS density                                            | 15 |
| S11 | Köhler curves of additional systems                                 | 16 |
| S12 | Variation of the surfactant                                         | 19 |
| S13 | Influence of organic fraction on the critical activation diameter   | 21 |

## S1 Influence of the Sigmoid parameter $d$

To test the influence of the parameter  $d$  on the critical supersaturation we calculated Köhler curves with Eq. 1. We assumed the particle to consist entirely of an organic (surface-active) substance, i.e., it contains no inorganic co-solute. We further assumed solution ideality, i.e.,  $a_w = x_w$ , where  $x_w$  is the mole fraction of water and the organic substance is assumed not to dissociate. The surface tension  $\sigma$  in the Kelvin equation (exponential function in Eq. 1) is calculated as a function of the total composition of the particle using the Sigmoid model (Eq. 2). As such, no bulk depletion is considered. The temperature is set to  $T = 25^\circ\text{C}$  and the molar volume of water to  $v_i N_A = 18.05 \text{ cm}^3 \text{ mol}^{-1}$ . In Fig. S1, the results are shown for three different substances, i.e., propionic acid, SDS, and oleic acid, which are covering a broad range of  $p$  values. The values for  $p$ ,  $\sigma_i$ , and  $v_i N_A$  which were used for each substance are annotated in the respective panel. The curves with  $d = 1$  are highlighted by a thicker, black line because the Eberhart model is a simplified version of the Sigmoid model with  $d = 1$ .

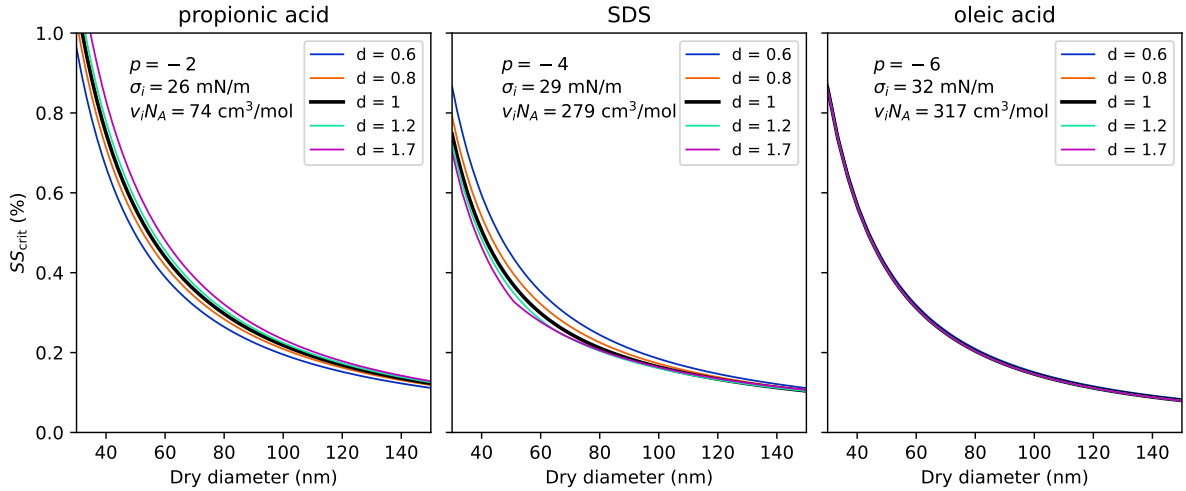

Figure S1: Influence of the Sigmoid model's parameter  $d$ : Critical supersaturation as a function of the dry diameter for three different substances and 5 different values for  $d$ .

It can be seen that the curves for the various  $d$  values are close to each other and in the case of oleic acid overlap entirely. The strongest influence of  $d$  on  $SS_{\text{crit}}$  is observed for the case with SDS. According to the fits with the Sigmoid model in El Haber et al. (2024),  $d = 1.65$  for SDS and small dry diameters. For dry diameters between 30 nm and 60 nm, assuming  $d = 1$  leads to an error in  $\Delta SS_{\text{crit}}$  of  $\approx 0.05\%$ . This error can be regarded as the maximum overall error, since here we assumed particles consisting entirely of the surfactant and bulk depletion is not considered, both of which enhance the surface tension lowering effect on  $SS_{\text{crit}}$ . This small maximum error justifies the assumption of  $d = 1$  in the Eberhart model for the purpose of calculating  $SS_{\text{crit}}$ .

## S2 Computational flowchart for the quaternary Eberhart–Monolayer model

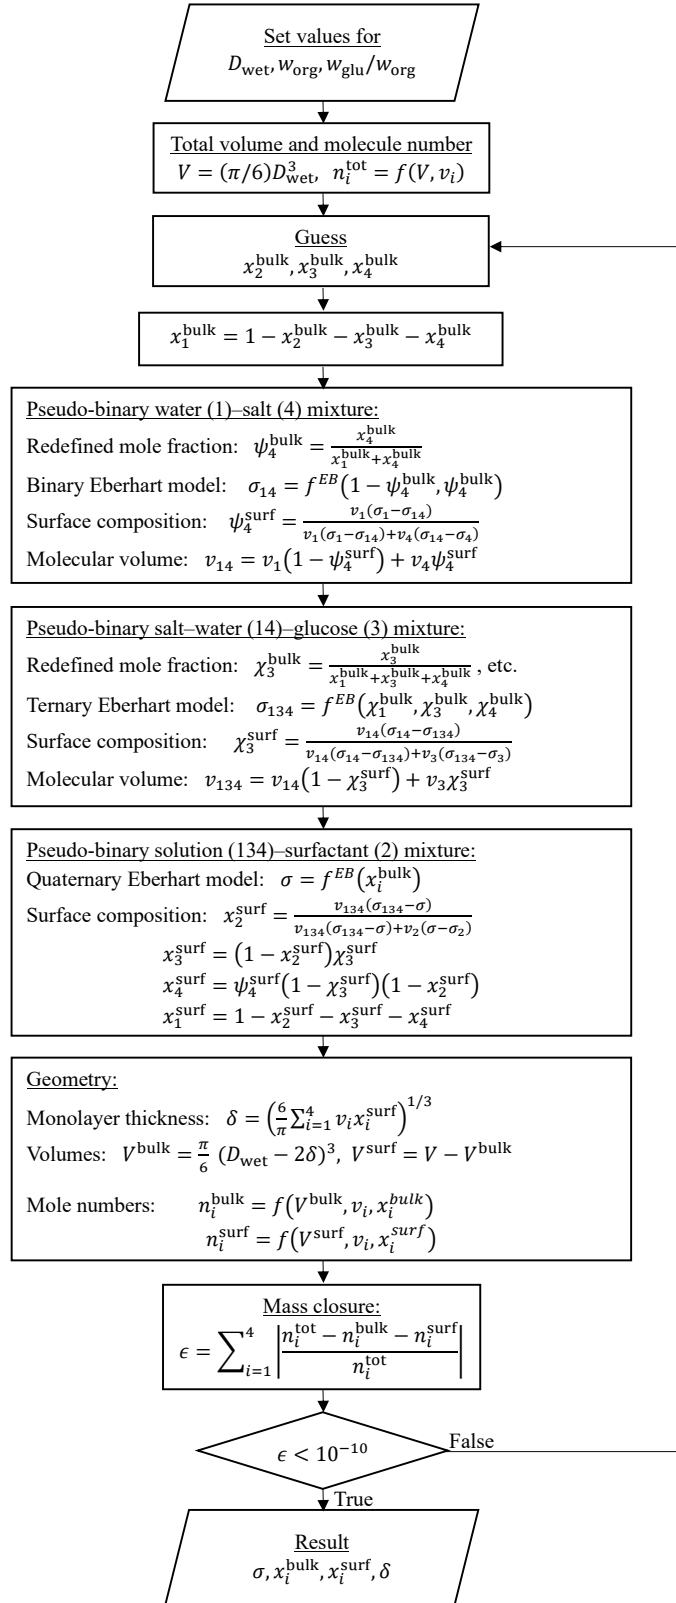

Figure S2: Flowchart for calculating bulk–surface partitioning with the Eberhart–Monolayer model for a quaternary mixture.

### S3 Comparison to surface tension data of small droplets

Bain et al. (2023) performed surface tension measurements of 6 – 9  $\mu\text{m}$  radius droplets containing one or two surfactants and a co-solute, i.e., NaCl or glutaric acid. In the same study, they combined the Monolayer model to describe partitioning with a Szyszkowski–Langmuir type equation for the surface tension isotherm to predict the surface tension of the small droplets. Similarly, here we compare our model, which uses the multi-component Eberhart model instead of the Szyszkowski–Langmuir type model, with their measurements. The results are shown in Fig. S3. Densities and molar masses were taken from Table S6 in the Supporting Information of Bain et al. (2023). The pure component surface tension of the surfactant  $\sigma_2$  was chosen to be equal to the surface tension of the binary water–surfactant solution at concentrations higher than the CMC. The binary separation factor of the surfactant in water  $S_{12}$  was determined by fitting the binary Eberhart model to binary water–surfactant surface tension data measured by Bain et al. (2023). Salting-out factors  $A_{23}^{\text{SO}}$  and  $B_{23}^{\text{SO}}$  were chosen such that the ternary Eberhart model (black lines) matches the experimental bulk data by Bain et al. (2023) (black circles). These model parameters are given at the right side of each panel. Blue solid and dashed lines show the surface tension of 6  $\mu\text{m}$  and 9  $\mu\text{m}$  radius droplets predicted by the Eberhart–Monolayer model, respectively. Like the results by Bain et al. (2023), our model seems to predict a slightly too strong surface partitioning leading to lower surface tensions for small droplets in most cases, but the general trends are reproduced well.

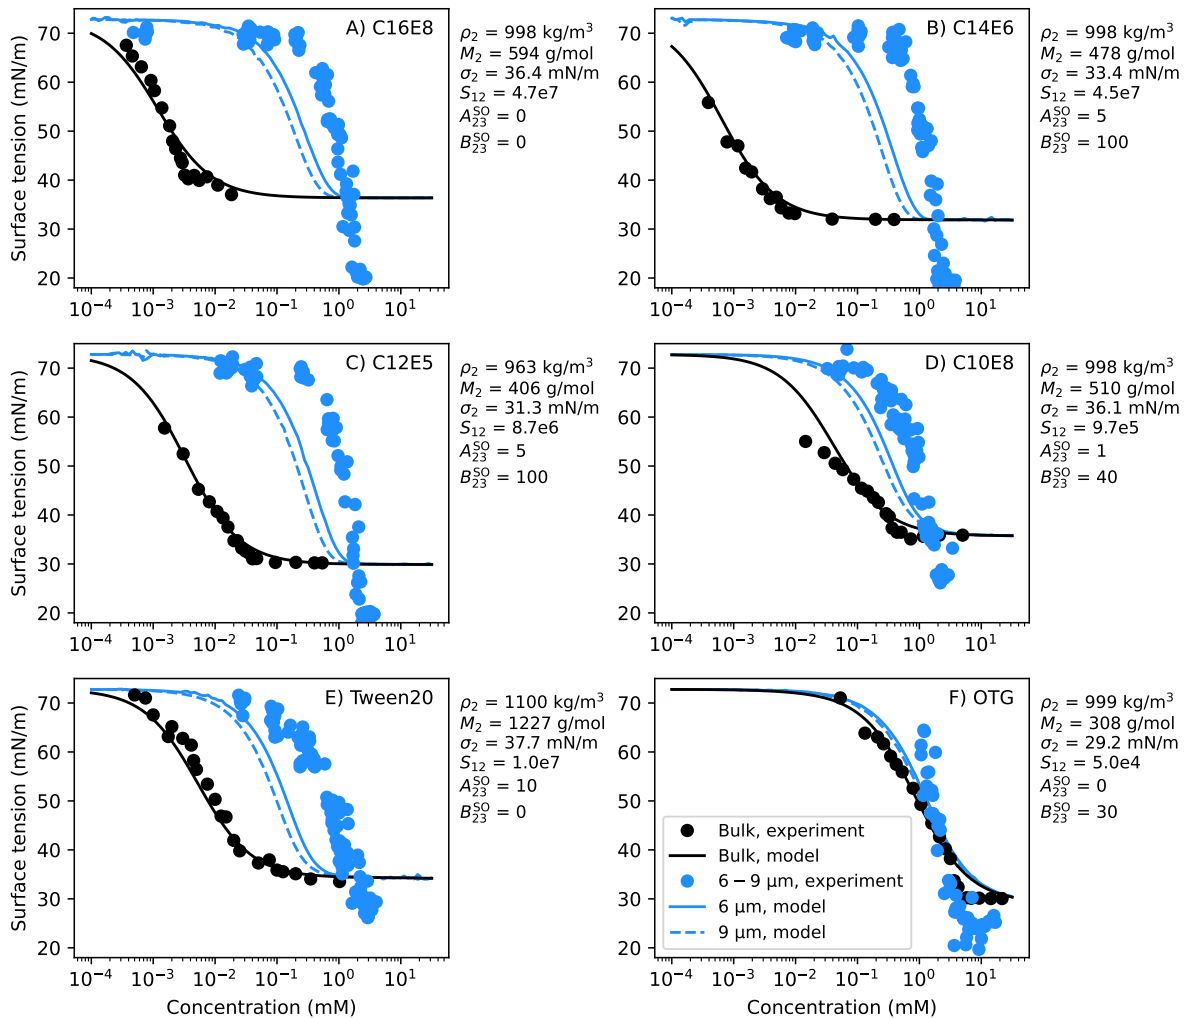

Figure S3: Comparison of the Eberhart–Monolayer model (lines) to surface tension measurements of droplets with a radius of 6 – 9  $\mu\text{m}$  (blue circles) and large droplets (“Bulk”, black circles) from Bain et al. (2023). The droplets contain 0.5 M NaCl and the surfactant annotated in the upper right corner of each panel. At the right side of each panel, the parameters used in the model for the respective surfactant are given.

## S4 Influence of solution non-ideality

The water activity (Raoult effect) plays an important role in the calculation of the critical supersaturation via Eq. 1. To test the sensitivity of  $SS_{\text{crit}}$  on the choice of  $a_w$ , Köhler curves were constructed based on four different ways to calculate  $a_w$ .

**First**, an ideal solution is assumed, i.e.,  $a_w = \hat{x}_w$ , where  $\hat{x}_w$  is calculated based on the dissociation of NaCl into 2 ions and no dissociation of the organic substances (labelled "ideal").

**Second**, to consider solution non-ideality,  $a_w$  is calculated with AIOMFAC. Note that liquid–liquid phase separation is not considered in that calculation, i.e., all substances are forced to be in one phase. We label this second approach "AIOMFAC-1ph".

**Third**, we calculate  $a_w$  assuming that the surfactant is hydrophobic and therefore entirely present in a separate phase, e.g., in the form of micelles or as a surface layer (labelled "surfactant hydrophobic"). In this case, the surfactant is not contributing to the Raoult effect, i.e., the bulk mole fractions are converted to "surfactant-free" mole fractions  $\tilde{x}$ . For a system of water(1)–surfactant(2)–glucose(3)–NaCl(4), for example, the surfactant-free mole fraction of water would be calculated as  $\tilde{x}_1 = x_1/(x_1 + x_3 + x_4)$ . Based on  $\tilde{x}_1, \tilde{x}_3$ , and  $\tilde{x}_4$ ,  $a_w$  is calculated with AIOMFAC. We label this third approach as "surfactant hydrophobic".

**Fourth**, we combine the "surfactant hydrophobic" case with AIOMFAC-1ph by taking the minimum  $a_w$  of both.

To test their influence, we use all four assumptions to calculate Köhler curves with either

1. the Eberhart–Monolayer model ( $a_w$  is calculated based on  $x_i^{\text{bulk}}$ ,  $\sigma = f(x_i^{\text{bulk}})$ ),
2. a calculation neglecting bulk depletion ( $a_w$  is calculated based on  $x_i^{\text{tot}}$ ,  $\sigma = f(x_i^{\text{tot}})$ ), and
3. Classical Köhler theory ( $a_w$  is calculated based on  $x_i^{\text{tot}}$ ,  $\sigma = \sigma_1$ ).

The result of this comparison for an SDS–NaCl particle of  $D_{\text{dry}} = 50$  nm particle with medium organic content is shown in Fig. S4. In the second row of all three columns, it can be seen that  $a_w$  predicted with AIOMFAC-1ph (blue dashed line) is higher than the one assuming a hydrophobic surfactant (yellow dashed line) at low wet diameters. Therefore, the particle is assumed to undergo LLPS in that range and the best estimate (black solid line) follows the "surfactant hydrophobic" calculation. As soon as AIOMFAC-1ph predicts a lower  $a_w$  than "surfactant hydrophobic" (blue and yellow lines are crossing), the droplet is assumed to be one homogeneous phase, and the best estimate follows AIOMFAC-1ph. This results in a local maximum in  $a_w$ , which also shows up as a global maximum in the Köhler curve when using Classical Köhler theory (first row, right column) and marks  $SS_{\text{crit}}$  in that case (black circle). In the calculation using classical Köhler theory, the higher surface tension ( $\sigma = \sigma_1$ , see third row) leads to a higher Kelvin effect and a higher  $SS_{\text{crit}}$  than those resulting from the first two model approaches. Yet, in all three model approaches,  $SS_{\text{crit}}$  calculated considering non-ideality (black circles) is very similar to that assuming solution ideality (gray circles). This applies to most cases analyzed in this study.

Solution non-ideality only had a considerable influence on  $SS_{\text{crit}}$  when the dry diameter is small ( $D_{\text{dry}} = 50$  nm) and the organic fraction is high and has a low O:C ratio. Two such examples are shown in Fig. S5 and Fig. S6 for an SDS–glucose–NaCl particle ( $w_{\text{glu}}/w_{\text{org}} = 0.05$ ) and a pinonic acid–NaCl particle, respectively, both having a high organic fraction and  $D_{\text{dry}} = 50$  nm. These two examples show that in cases with high organic fraction and small dry diameters, the particles undergo little hygroscopic growth and, as a result, are still in a phase-separated state at activation leading to increased  $SS_{\text{crit}}$  values compared to a calculation assuming ideality.

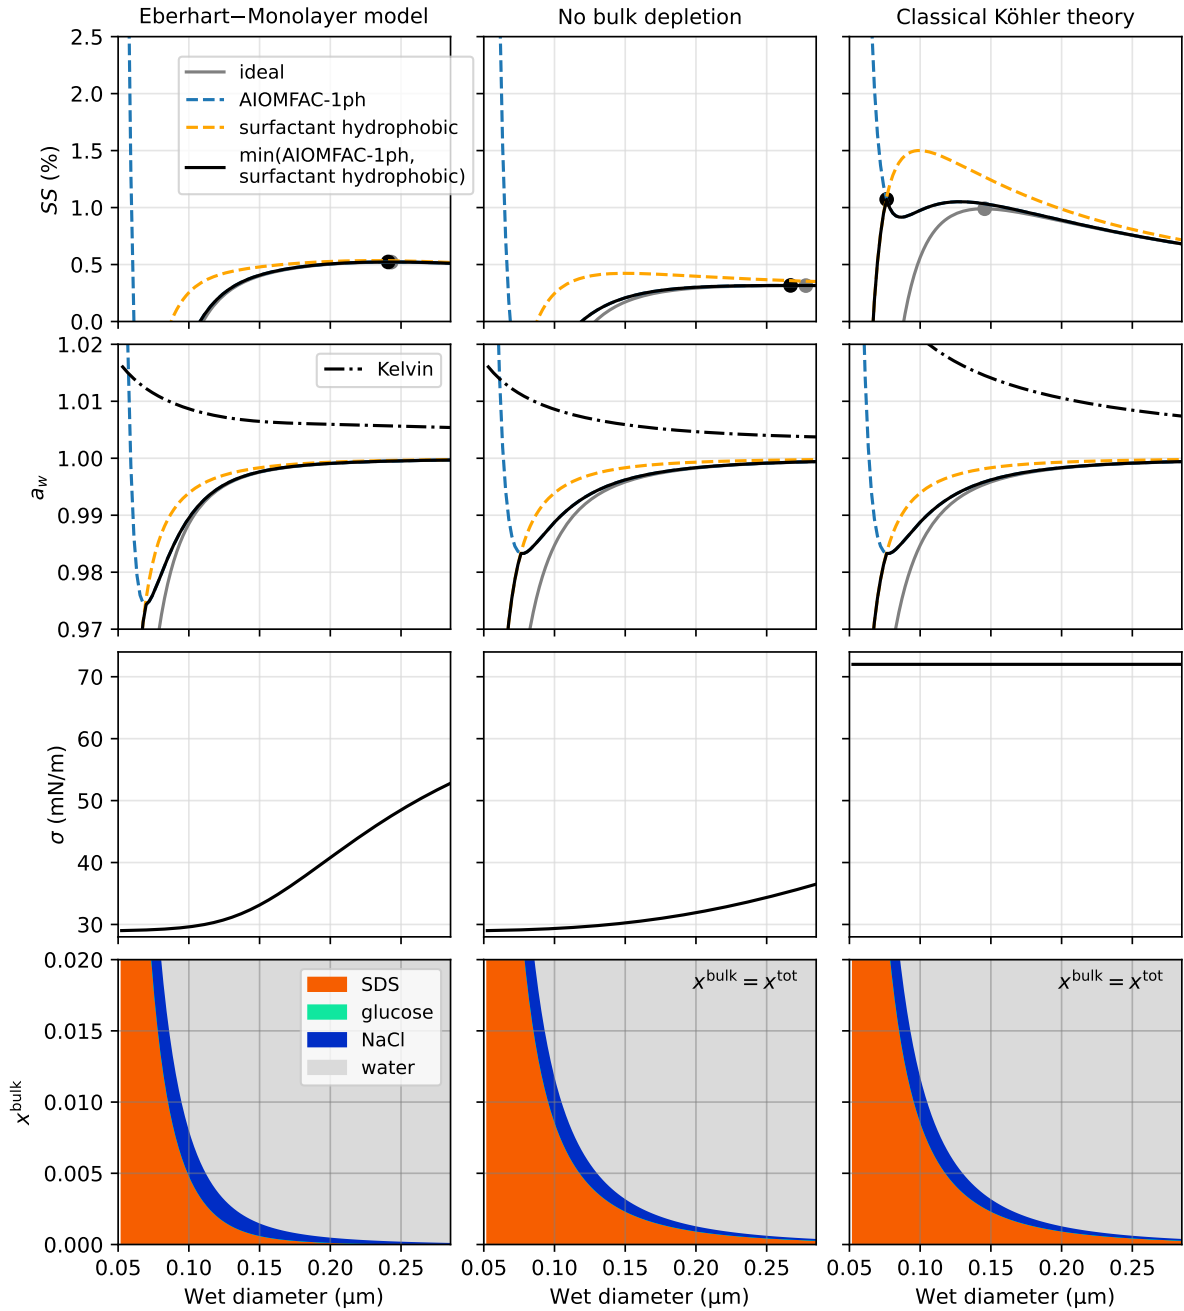

Figure S4: Four different ways of calculating the Raoult effect (see legend) in Köhler curves using three different model approaches (columns): with the Eberhart–Monolayer model, assuming no bulk depletion, and with Classical Köhler theory. Calculations are for an SDS–NaCl particle with  $D_{\text{dry}} = 50$  nm with an organic fraction ”med” ( $w_{\text{glu}}/w_{\text{org}} = 0$ ). First row: Köhler curve and critical supersaturation (circle). Second row: water activity  $a_w$  (Raoult effect) and saturation ratio of the Kelvin effect, calculated with the exponential function in Eq. 1. Third row: droplet surface tension. Fourth row: bulk composition (first column) and total composition (second and third column). The y-axis range was limited to 0–0.02 for a better visibility of the solute share. SDS is represented with dodecanoic acid in AIOMFAC and assumed not to dissociate in Classical Köhler theory.

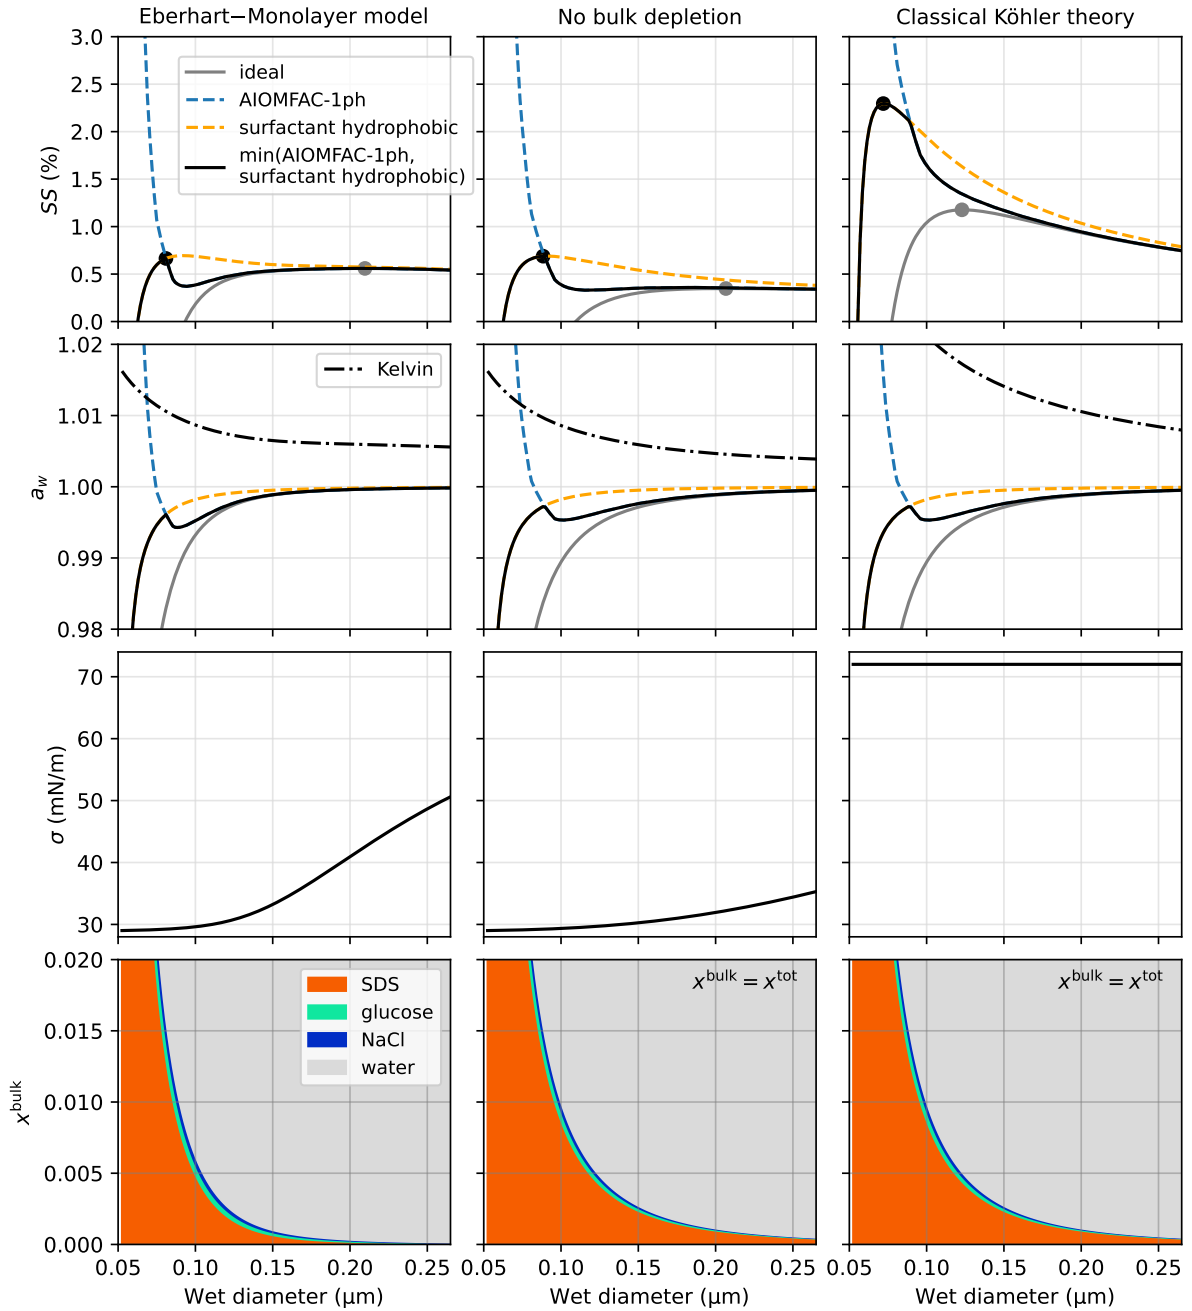



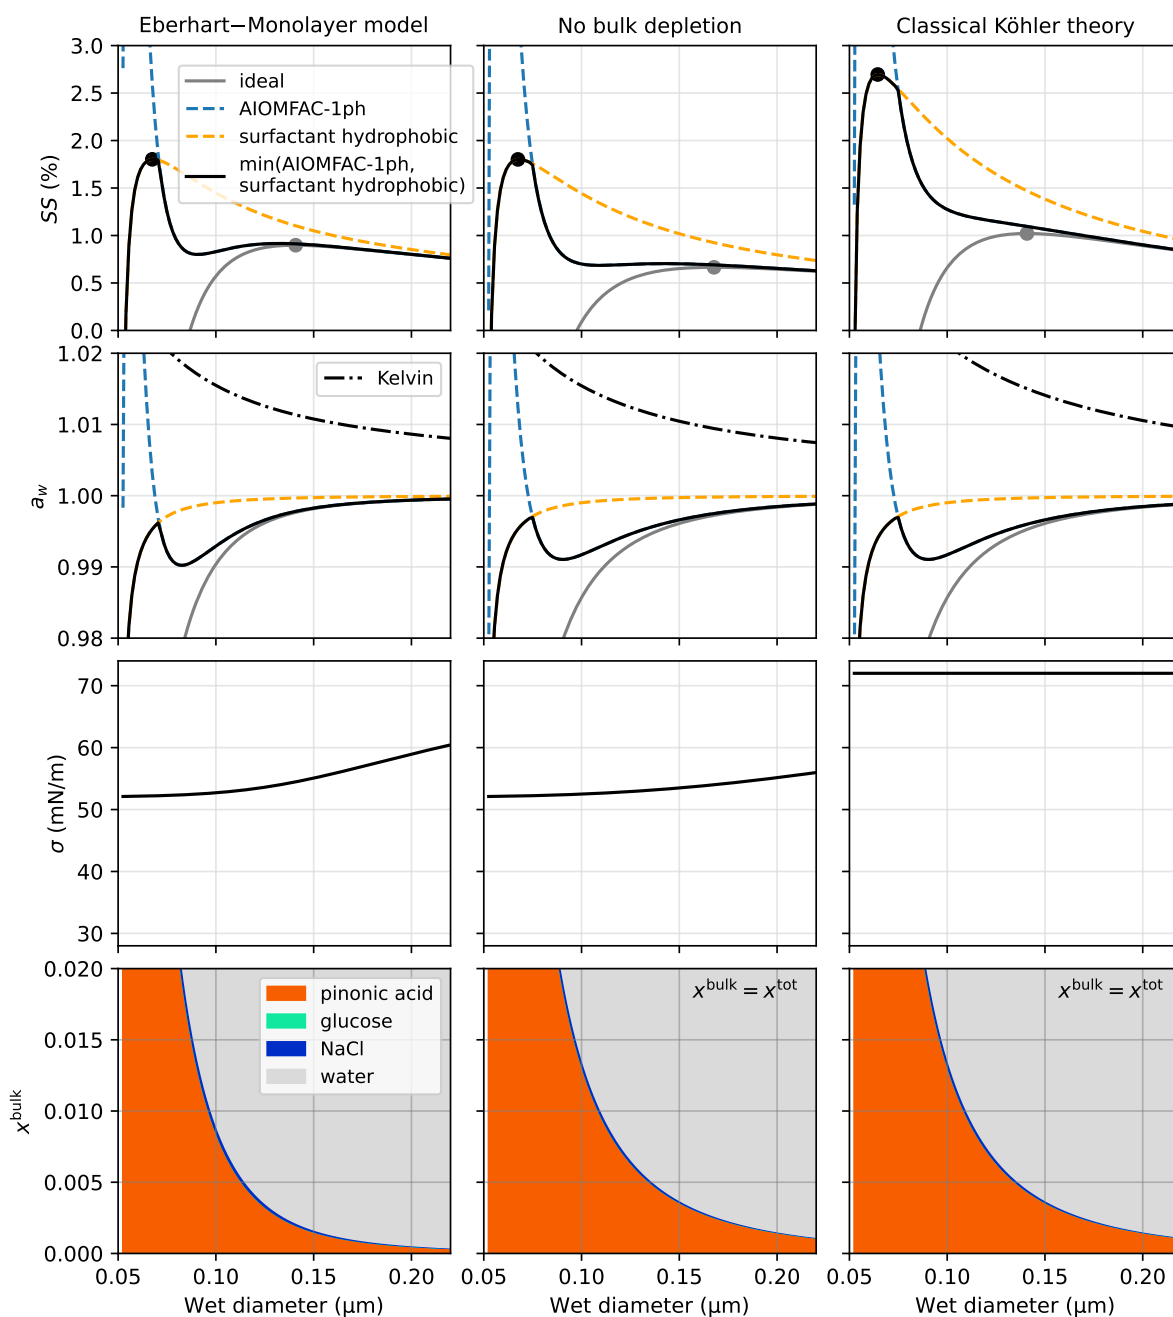

Figure S6: Four different ways of calculating the Raoult effect (see legend) in Köhler curves using three different model approaches (columns): with the Eberhart–Monolayer model, assuming no bulk depletion, and with Classical Köhler theory. Calculations are for a pinonic acid–NaCl particle with  $D_{\text{dry}} = 50$  nm and an organic fraction “high” ( $w_{\text{glu}}/w_{\text{org}} = 0$ ). First row: Köhler curve and critical supersaturation (circle). Second row: water activity  $a_w$  (Raoult effect) and saturation ratio of the Kelvin effect, calculated with the exponential function in Eq. 1. Third row: droplet surface tension. Fourth row: bulk composition (first column) and total composition (second and third column). The y-axis range was limited to 0–0.02 for a better visibility of the solute share.

## S5 Influence of SDS dissociation

In past studies, sodium dodecyl sulfate (SDS) often was assumed to fully dissociate in solution (e.g., Sorjamaa et al., 2004; Prisle et al., 2010). In fact, SDS can undergo dissociation in aqueous solution, the degree of which depends on the degree of dilution in water, as well as on the relative ratio of NaCl and SDS (Matijević and Pethica, 1958). This raises the question of which van't Hoff factor should be used in calculations assuming solution ideality. Furthermore, SDS cannot be represented with the functional groups implemented in AIOMFAC, due to the organic-sulfate group, raising the question of how to implement solution non-ideality. To test the sensitivity of the critical supersaturation on the van't Hoff factor of SDS as well as its representation in AIOMFAC for solution non-ideality for the calculation of  $a_w$ , we tested three cases. First, we represented SDS by dodecanoic acid in AIOMFAC, which is a fatty acid with the same hydrocarbon chain length and an amphiphilic, non-dissociating molecule. Second, we assumed solution ideality with a van't Hoff factor of  $v_{H,SDS} = 1$ . Third, we assumed full dissociation of SDS by using  $v_{H,SDS} = 2$ .  $SS_{crit}$  for these cases and all three model approaches is shown in Fig. S7.

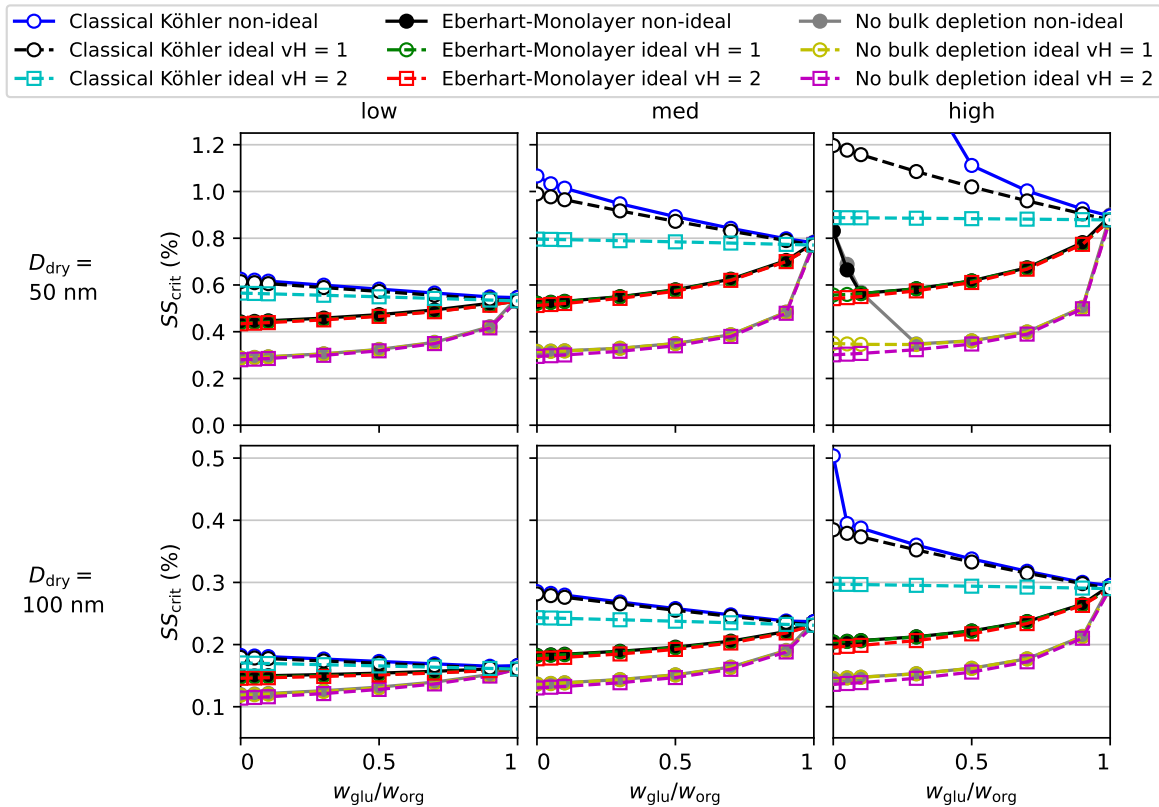

Figure S7: Influence of solution non-ideality and SDS dissociation on  $SS_{crit}$  of SDS-NaCl particles calculated with the three different model approaches (classical Köhler theory, the Eberhart-Monolayer model, and assuming no bulk depletion). In cases labelled "non-ideal",  $a_w$  is calculated using AIOMFAC (best estimate, see Sect. S4), with SDS being represented with dodecanoic acid (non-dissociating). Cases labelled "ideal" assume  $\gamma_w = 1$ , full dissociation of NaCl and either no dissociation of SDS ("vH = 1") or full dissociation of SDS ("vH = 2").

When using classical Köhler theory, a strong influence of solution non-ideality and the degree of dissociation of SDS on  $SS_{crit}$  is found, except for particles with  $D_{dry} = 100$  nm and low organic content ( $\Delta SS_{crit} < 0.012\%$ ). In contrast, the influence of solution non-ideality and SDS dissociation on  $SS_{crit}$  is negligible in calculations with the Eberhart-Monolayer model or assuming no bulk depletion. Only at high SDS content (e.g., 98.8% in dry mass), the critical supersaturation is much higher when representing SDS with dodecanoic acid due to LLPS. The reason of the higher influence of dissociation and non-ideality in classical Köhler theory is that all SDS is assumed to remain in the bulk thereby contributing to the Raoult effect. Furthermore, the lower surface tension in the other two model approaches leads to a stronger particle growth as a function of RH, such that at activation the Raoult effect is very close to 1 and less sensitive to the SDS representation in the model.

## S6 Eberhart fit parameters of organic substances

The parameters  $\sigma_i$  and  $S_{1i}$  were determined for 76 organic substances based on the data compiled by El Haber et al. (2024) as follows. The pure component surface tension  $\sigma_i$  for each substance was calculated as an average of the experimental pure component surface tensions given in Tables 1-3 in El Haber et al. (2024). If no pure component surface tension is given by El Haber et al. (2024),  $\sigma_i$  was used as a fit parameter and determined together with  $S_{1i}$  by fitting the binary Eberhart model (Eq. 3) to experimental binary surface tension data provided by El Haber et al. (2024) in the supplement. For the fitting, all experimental datasets given in the supplement of El Haber et al. (2024) were considered that were also used by El Haber et al. (2024) when fitting the Sigmoid model to determine their recommended data. For example, for propionic acid, a binary Eberhart model fit was made to the combined experimental data from Alvarez et al. (1997), Granados et al. (2006), and Suárez and Romero (2011), as shown in Fig. S10 in the upper left panel.

Table S1: Eberhart fit parameters of acids shown in Fig. 3. Substances with a star correspond to those denoted by a star in Fig. 3.  $CI_{95}$  is the 95 % confidence interval of parameters that were fitted. References for  $\sigma_i$  values from measurements (i.e., that have no  $CI_{95}$  value) can be found in El Haber et al. (2024). RMSE is the root mean square error.

| No. | name                 | $S_{1i}$ | $CI_{95}(S_{1i})$ | $\sigma_i$<br>(mN m <sup>-1</sup> ) | $CI_{95}(\sigma_i)$<br>(mN m <sup>-1</sup> ) | $\sigma_1$<br>(mN m <sup>-1</sup> ) | RMSE<br>(mN m <sup>-1</sup> ) |
|-----|----------------------|----------|-------------------|-------------------------------------|----------------------------------------------|-------------------------------------|-------------------------------|
| ★   | propionic acid       | 55.3     | 4.6               | 26.2                                |                                              | 72.0                                | 0.664                         |
| ★   | valeric acid         | 974.6    | 36.6              | 26.7                                |                                              | 72.0                                | 0.073                         |
| ★   | glutaric acid        | 67.3     | 10.5              | 53.1                                | 0.8                                          | 72.0                                | 0.026                         |
| ★   | pinonic acid         | 3.7e3    | 1.5e3             | 52.1                                | 3.6                                          | 72.0                                | 0.075                         |
| ★   | oleic acid           | 9.9e6    | 4.4e6             | 32.2                                |                                              | 72.0                                | 0.618                         |
| 1   | formic acid          | 5.4      | 0.5               | 37.5                                |                                              | 72.0                                | 0.014                         |
| 2   | acetic acid          | 15.6     | 1.3               | 27.9                                |                                              | 72.0                                | 0.257                         |
| 3   | butyric acid         | 199.2    | 12.1              | 26.2                                |                                              | 72.0                                | 0.053                         |
| 4   | oxalic acid          | 16.8     | 9.4               | 62.7                                | 3.4                                          | 72.0                                | 0.117                         |
| 5   | methanesulfonic acid | 13.9     | 2.4               | 53.0                                |                                              | 72.0                                | 0.002                         |
| 6   | malonic acid         | 26.7     | 5.8               | 60.5                                | 0.9                                          | 72.0                                | 0.068                         |
| 7   | maleic acid          | 33.4     | 8.6               | 55.2                                | 1.5                                          | 72.0                                | 0.062                         |
| 8   | caproic acid         | 4.5e3    | 4.5e2             | 27.5                                |                                              | 72.0                                | 0.037                         |
| 9   | succinic acid        | 119.1    | 55.1              | 64.2                                | 1.8                                          | 72.0                                | 0.024                         |
| 10  | malic acid           | 35.2     | 15.7              | 66.2                                | 0.9                                          | 72.0                                | 0.021                         |
| 11  | caprylic acid        | 4.2e4    | 7.8e3             | 28.8                                |                                              | 72.0                                | 0.714                         |
| 12  | adipic acid          | 596.2    | 228.0             | 60.8                                | 2.3                                          | 72.0                                | 0.09                          |
| 13  | pelargonic acid      | 2.0e5    | 2.2e4             | 27.9                                |                                              | 72.0                                | 0.412                         |
| 14  | citric acid          | 87.8     | 48.7              | 65.1                                | 1.0                                          | 72.0                                | 0.067                         |
| 15  | ricinoleic acid      | 1.9e6    | 4.8e5             | 32.9                                | 1.7                                          | 72.0                                | 0.421                         |
| 16  | arachidonic acid     | 5.2e6    | 1.5e6             | 29.0                                | 2.6                                          | 72.0                                | 0.003                         |

Table S1 (continued): Eberhart fit parameters of alcohols, ketones, aldehydes, sugars, amines, surfactants, and macromolecules shown in Fig. 3. Substances with a star correspond to those denoted by a star in Fig. 3.  $CI_{95}$  is the 95 % confidence interval of parameters that were fitted. References for  $\sigma_i$  values that have been measured (i.e., that have no  $CI_{95}$  value) can be found in El Haber et al. (2024). RMSE is the root mean square error.

| No. | name                       | $S_{1i}$ | $CI_{95}(S_{1i})$ | $\sigma_i$<br>(mN m <sup>-1</sup> ) | $CI_{95}(\sigma_i)$<br>(mN m <sup>-1</sup> ) | $\sigma_1$<br>(mN m <sup>-1</sup> ) | RMSE<br>(mN m <sup>-1</sup> ) |
|-----|----------------------------|----------|-------------------|-------------------------------------|----------------------------------------------|-------------------------------------|-------------------------------|
| 17  | methanol                   | 7.3      | 0.3               | 23.5                                |                                              | 72.0                                | 0.016                         |
| 18  | ethanol                    | 20.1     | 0.8               | 22.2                                |                                              | 72.0                                | 0.458                         |
| 19  | acetone                    | 24.7     | 2.4               | 23.5                                |                                              | 72.0                                | 0.385                         |
| 20  | propan-1-ol                | 95.0     | 7.0               | 24.0                                |                                              | 72.0                                | 0.394                         |
| 21  | propan-2-ol                | 69.8     | 7.6               | 23.5                                |                                              | 72.0                                | 0.734                         |
| 22  | ethylene glycol            | 6.6      | 0.5               | 46.6                                |                                              | 72.0                                | 0.038                         |
| 23  | propylene glycol           | 14.8     | 0.8               | 35.9                                |                                              | 72.0                                | 0.07                          |
| 24  | propane-1,3-diol           | 12.8     | 2.2               | 46.3                                |                                              | 72.0                                | 0.216                         |
| 25  | pentan-1-ol                | 1.3e3    | 1.4e2             | 25.2                                |                                              | 72.0                                | 0.105                         |
| 26  | 1,3-butanediol             | 27.2     | 3.1               | 37.0                                |                                              | 72.0                                | 0.291                         |
| 27  | 1,4-butanediol             | 22.9     | 3.6               | 43.8                                |                                              | 72.0                                | 0.275                         |
| 28  | glycerol                   | 4.4      | 0.9               | 63.0                                |                                              | 72.0                                | 0.031                         |
| 29  | hexan-1-ol                 | 4.3e3    | 4.5e2             | 25.8                                |                                              | 72.0                                | 0.028                         |
| 30  | hexan-2-ol                 | 2.6e3    | 1.1e2             | 24.5                                |                                              | 72.0                                | 0.374                         |
| 31  | 2,3-dimethylbutan-2-ol     | 1.2e3    | 9.7e1             | 23.7                                |                                              | 72.0                                | 0.753                         |
| 32  | 2-methylpentan-2-ol        | 1.8e3    | 1.1e2             | 23.7                                |                                              | 72.0                                | 0.317                         |
| 33  | 1,5-pentanediol            | 355.2    | 175.9             | 44.2                                |                                              | 72.0                                | 0.22                          |
| 34  | heptan-1-ol                | 2.3e4    | 3.9e3             | 26.6                                |                                              | 72.0                                | 0.108                         |
| 35  | hexane-1,2-diol            | 707.7    | 69.7              | 23.8                                |                                              | 72.0                                | 0.364                         |
| 36  | hexane-1,6-diol            | 324.1    | 38.0              | 42.3                                | 0.7                                          | 72.0                                | 0.061                         |
| 37  | hexane-1,5-diol            | 234.3    | 31.5              | 33.9                                |                                              | 72.0                                | 0.042                         |
| 38  | hexane-2,5-diol            | 132.0    | 20.1              | 31.6                                |                                              | 72.0                                | 0.522                         |
| 39  | octan-1-ol                 | 3.6e4    | 8.8e3             | 27.2                                |                                              | 72.0                                | 0.144                         |
| 40  | 2,3-dihydroxynaphthalene   | 5.2e4    | 8.3e3             | 48.2                                | 1.0                                          | 72.0                                | 0.006                         |
| 41  | colamine                   | 6.8      | 1.2               | 48.4                                |                                              | 72.0                                | 0.258                         |
| 42  | pyrrolidine                | 25.3     | 6.9               | 29.7                                |                                              | 72.0                                | 1.223                         |
| 43  | threanine                  | 9.8      | 2.5               | 37.4                                |                                              | 72.0                                | 0.351                         |
| 44  | 3-aminopropan-1-ol         | 6.5      | 0.5               | 44.3                                |                                              | 72.0                                | 0.046                         |
| 45  | 2-(methylamino)ethan-1-ol  | 9.6      | 1.3               | 35.3                                |                                              | 72.0                                | 0.208                         |
| 46  | piperidine                 | 108.1    | 37.0              | 29.5                                |                                              | 72.0                                | 1.051                         |
| 47  | 2-(ethylamino)ethan-1-ol   | 26.6     | 8.5               | 32.2                                |                                              | 72.0                                | 1.108                         |
| 48  | cyclohexanamine            | 885.3    | 140.5             | 32.1                                |                                              | 72.0                                | 0.741                         |
| 49  | diolamine                  | 9.8      | 2.3               | 47.2                                |                                              | 72.0                                | 0.035                         |
| 50  | methyl diethanolamine      | 19.3     | 2.4               | 38.2                                |                                              | 72.0                                | 0.164                         |
| 51  | DL-norleucine              | 568.3    | 561.2             | 68.1                                | 2.4                                          | 72.0                                | 0.016                         |
| 52  | hexamethylenetetramine     | 117.8    | 6.8               | 62.3                                | 0.1                                          | 72.0                                | 0.006                         |
| 53  | trolamine                  | 23.1     | 0.2               | 46.0                                |                                              | 72.0                                | 0.015                         |
| 54  | levoglucosan               | 45.3     | 94.0              | 69.5                                | 2.0                                          | 72.0                                | 0.508                         |
| 55  | D-(+)-maltose              | 9.0      | 6.7               | 63.9                                | 4.8                                          | 72.0                                | 0.009                         |
| ★   | SDS                        | 1.4e4    | 2.7e3             | 29.0                                | 2.6                                          | 72.0                                | 0.591                         |
| 56  | DTAB                       | 8.3e3    | 2.1e3             | 28.6                                | 3.6                                          | 72.0                                | 0.579                         |
| 57  | CTAB                       | 1.5e5    | 1.9e4             | 29.2                                | 1.8                                          | 72.0                                | 0.259                         |
| 58  | AOT                        | 1.3e5    | 2.1e4             | 27.6                                | 1.4                                          | 72.0                                | 0.301                         |
| 59  | Triton X114                | 5.5e6    | 1.6e6             | 30.2                                | 1.4                                          | 72.0                                | 0.528                         |
| 60  | Brij35                     | 5.5e6    | 1.4e6             | 43.7                                | 1.2                                          | 72.0                                | 0.165                         |
| 61  | mono-rhamnolipid           | 7.7e6    | 2.7e6             | 27.0                                | 2.9                                          | 72.0                                | 0.858                         |
| 62  | di-rhamnolipid             | 7.0e6    | 1.8e6             | 30.4                                | 2.1                                          | 72.0                                | 0.434                         |
| 63  | surfactin                  | 1.4e7    | 7.7e6             | 27.9                                | 5.6                                          | 72.0                                | 0.191                         |
| 64  | syringafactin B/C          | 4.3e5    | 1.8e5             | 19.7                                | 6.2                                          | 72.0                                | 0.609                         |
| 65  | viscosin                   | 8.4e6    | 4.2e6             | 23.9                                | 5.8                                          | 72.0                                | 0.359                         |
| 66  | Suwannee river fulvic acid | 1.3e4    | 3.7e3             | 39.9                                | 2.7                                          | 72.0                                | 0.276                         |
| 67  | NAFA                       | 8.5e4    | 3.3e4             | 45.1                                | 5.0                                          | 72.0                                | 0.156                         |
| 68  | Humic acid                 | 1.7e4    | 1.4e4             | 54.0                                | 3.9                                          | 72.0                                | 0.045                         |
| 69  | HULIS                      | 1.9e5    | 1.6e5             | 45.5                                | 5.9                                          | 72.0                                | 0.229                         |
| 70  | Macromolecules EPS         | 5.4e7    | 3.1e7             | 56.0                                | 2.6                                          | 72.0                                | 0.209                         |

## S7 Surface tension isotherms of atmospheric samples

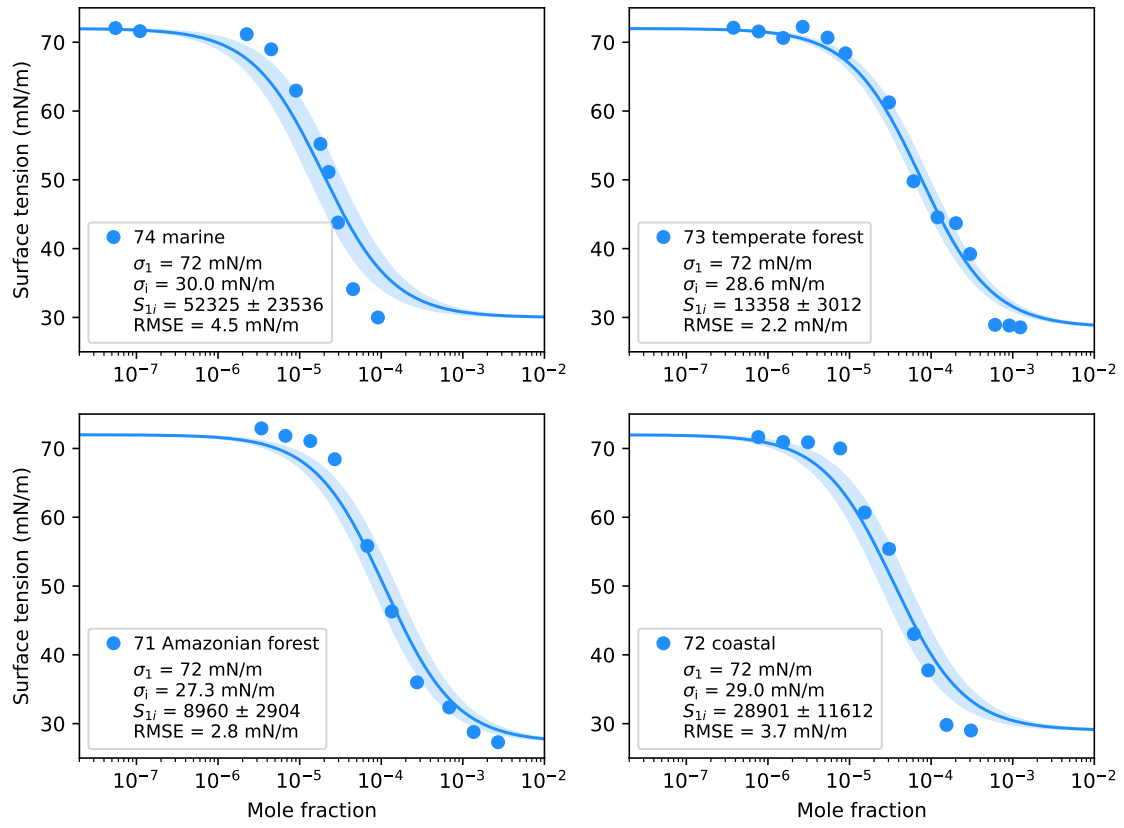

Figure S8: Eberhart model (Eq. 3) fits (solid lines) to surface tension data (markers) of atmospheric sample extracts from Ekström et al. (2010) taken at four different locations. Numbers 71–74 refer to the numbering in Fig. 3. Colored shading shows the 95% confidence interval. In the legend, the model parameters are given.  $\sigma_1$  was set to  $72 \text{ mN m}^{-1}$  for all samples and  $\sigma_i$  was taken to be the minimum of the experimental data.  $S_{1i}$  was fitted and its 95% confidence interval is given as the uncertainty. RMSE is the root mean square error.

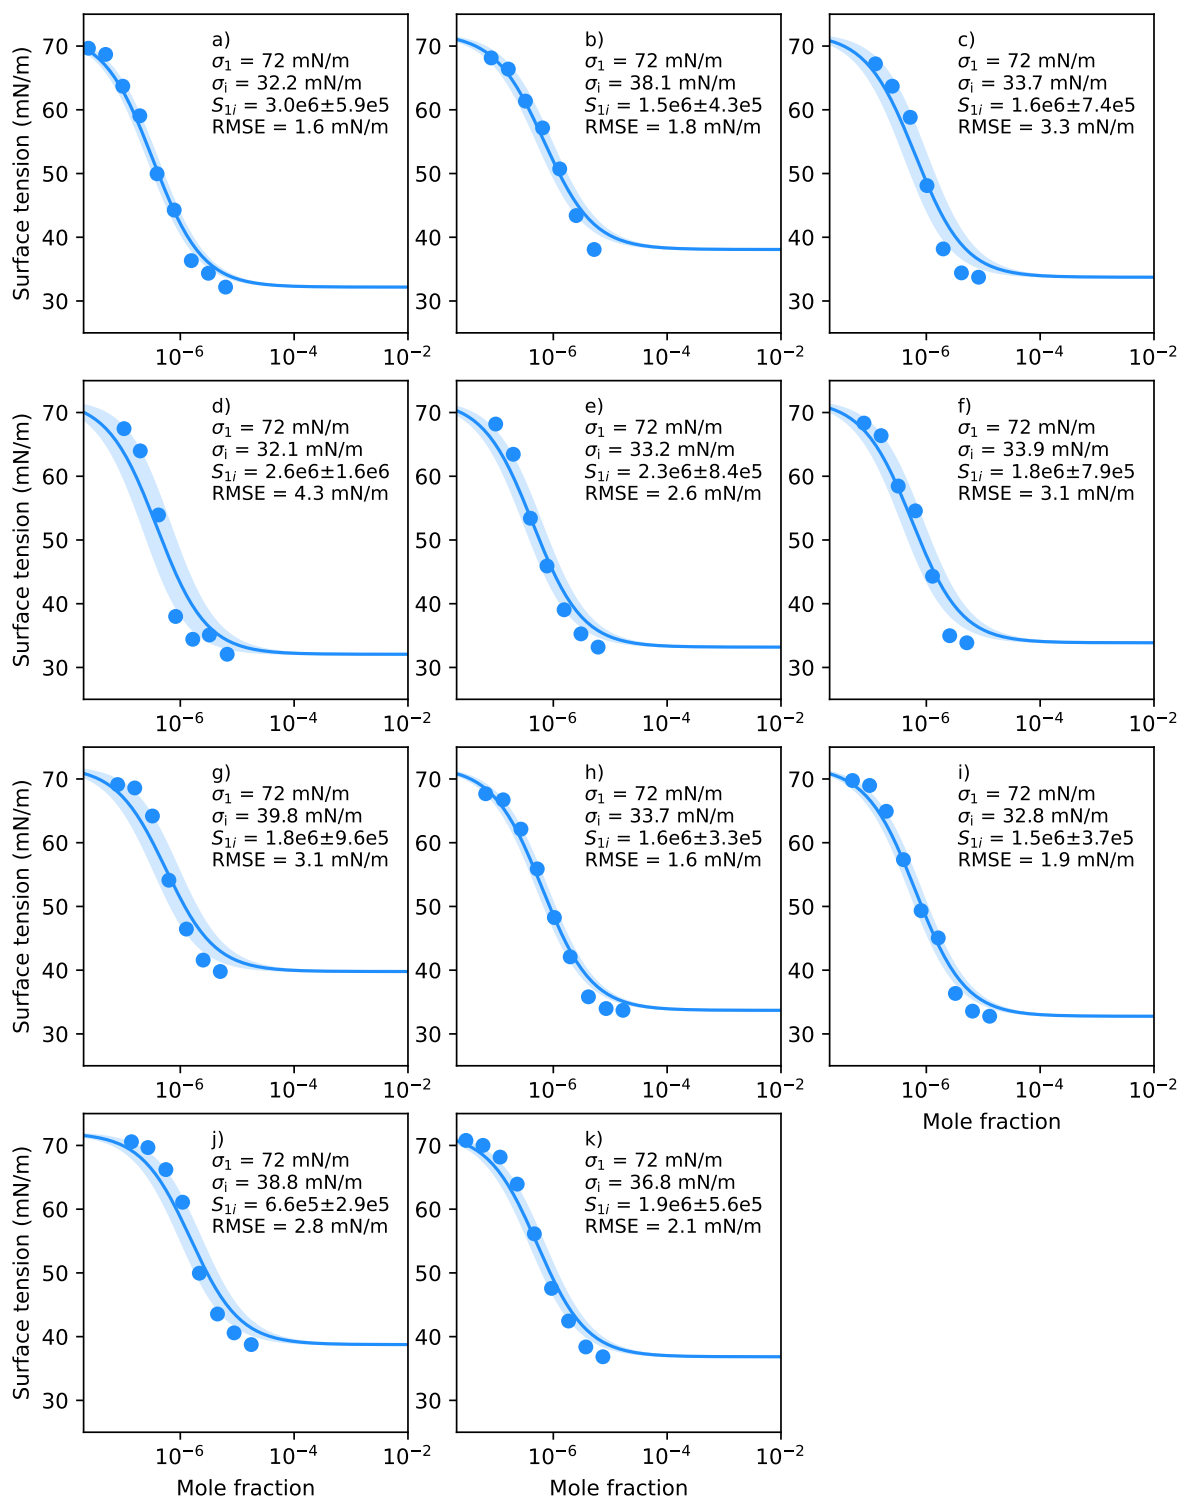

Figure S9: Eberhart model (Eq. 3) fits (solid lines) to surface tension data (markers) of 11 atmospheric sample extracts (a-k) from Gérard et al. (2016) taken at the Baltic Coast at Askö in Sweden. Colored shading shows the 95 % confidence interval. In each panel, the model parameters are shown.  $\sigma_1$  was set to  $72 \text{ mN m}^{-1}$  for all samples and  $\sigma_i$  was taken to be the minimum of the experimental data.  $S_{1i}$  was fitted and its 95 % confidence interval is given as the uncertainty. RMSE is the root mean square error.

## S8 Surface tension isotherms of the model compounds

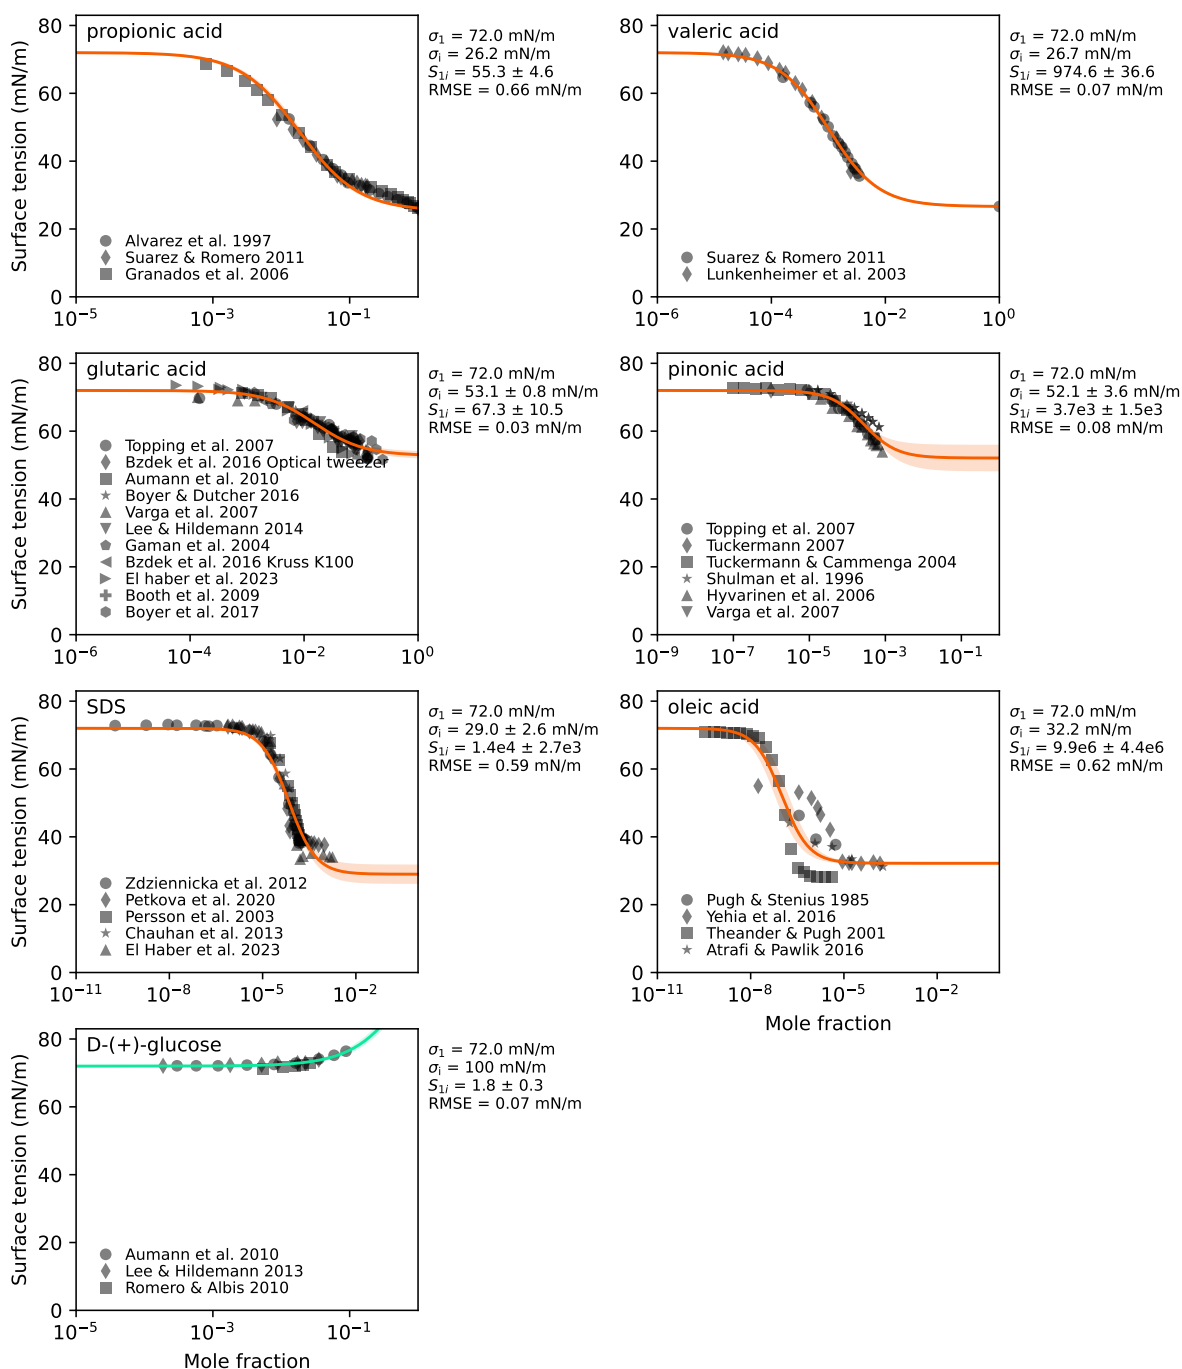

Figure S10: Binary surface tension data (black markers) and Eberhart model fits (colored solid lines) for the model compounds in this study. Fit parameters are annotated in the respective panel together with the root mean square error (RMSE). The colored shading represents the 95% confidence interval of the fit. Different markers represent different datasets. For further information on the underlying data refer to El Haber et al. (2024). For NaCl, refer to Kleinheins et al. (2023).

## S9 Influence of salting-out

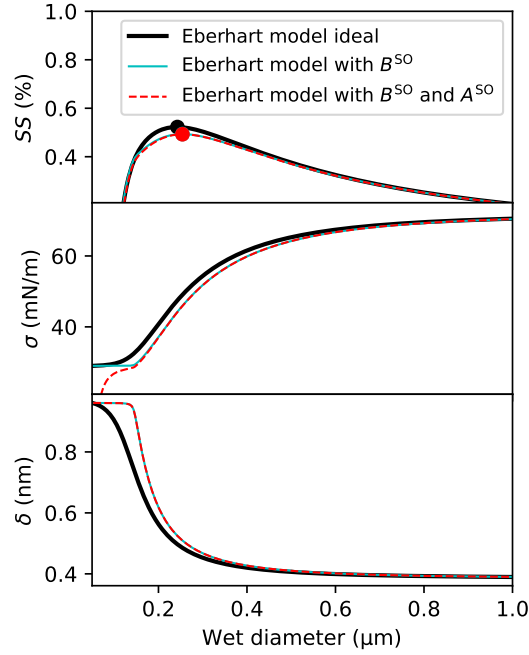

Figure S11: Influence of surface tension non-ideality (salting-out) on the Köhler curve (first row) and critical supersaturation (circle), droplet surface tension  $\sigma$  (second row), and the monolayer thickness  $\delta$  (third row), using an artificially high salting-out factor of  $B_{24}^{SO} = 10^5$ . Three cases are distinguished: assuming ideality (solid black lines,  $A_{24}^{SO} = 0, B_{24}^{SO} = 0$ ), considering bulk related salting-out (solid cyan lines  $A_{24}^{SO} = 0, B_{24}^{SO} = 10^5$ ), and considering bulk and surface related salting-out (dashed red line,  $A_{24}^{SO} = 22.63, B_{24}^{SO} = 10^5$ ). In all cases,  $D_{dry} = 50$  nm,  $w_{org} = 0.93$  ("med"), and  $w_{glu}/w_{org} = 0$ .

## S10 Influence of SDS density

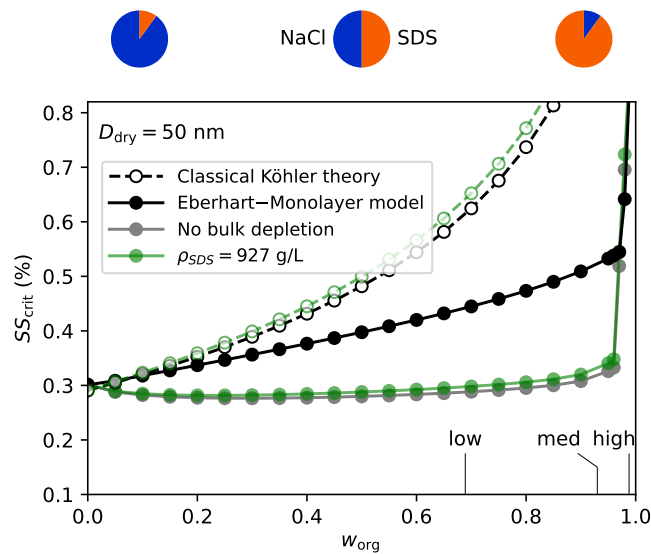

Figure S12: Influence of the SDS density on the results in Fig. 5. Black and gray data is calculated using  $\rho_{SDS} = 1030$  g L<sup>-1</sup> and green data is calculated using a 10% lower density, i.e.,  $\rho_{SDS} = 927$  g L<sup>-1</sup>.



## S11 Köhler curves of additional systems

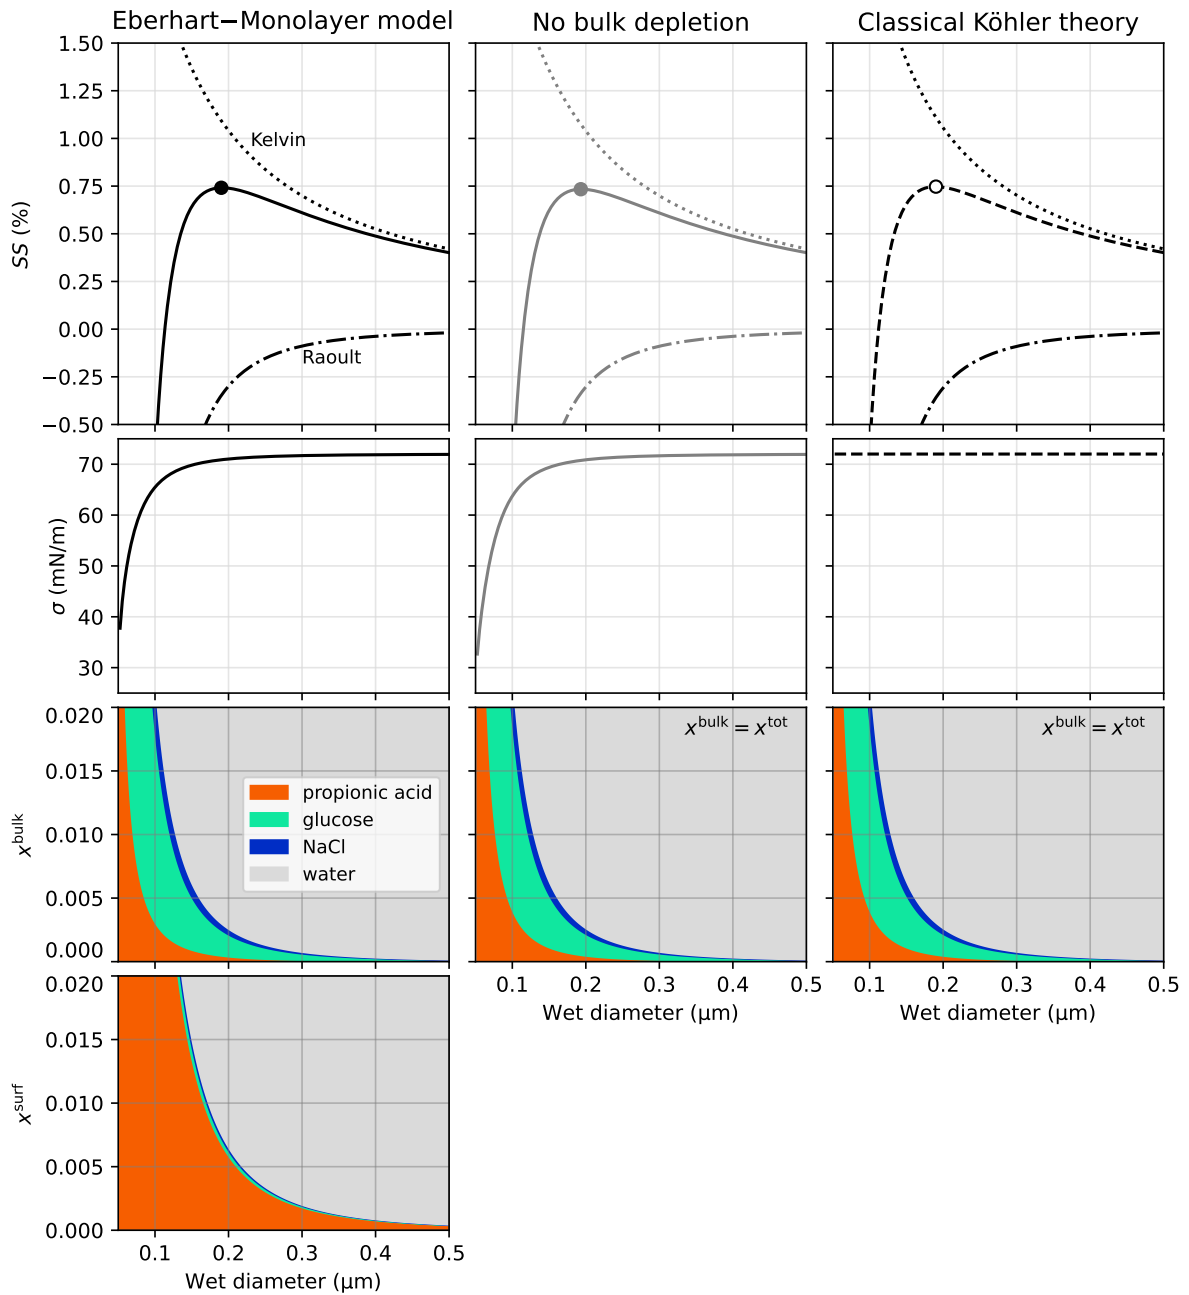

Figure S13: Same as Fig. 4 but using propionic acid instead of SDS and a high fraction of glucose ( $w_{\text{glu}}/w_{\text{org}} = 0.9$ ). In the third and fourth row, the y-axis range was limited to 0–0.02 for a better visibility of the solute share.

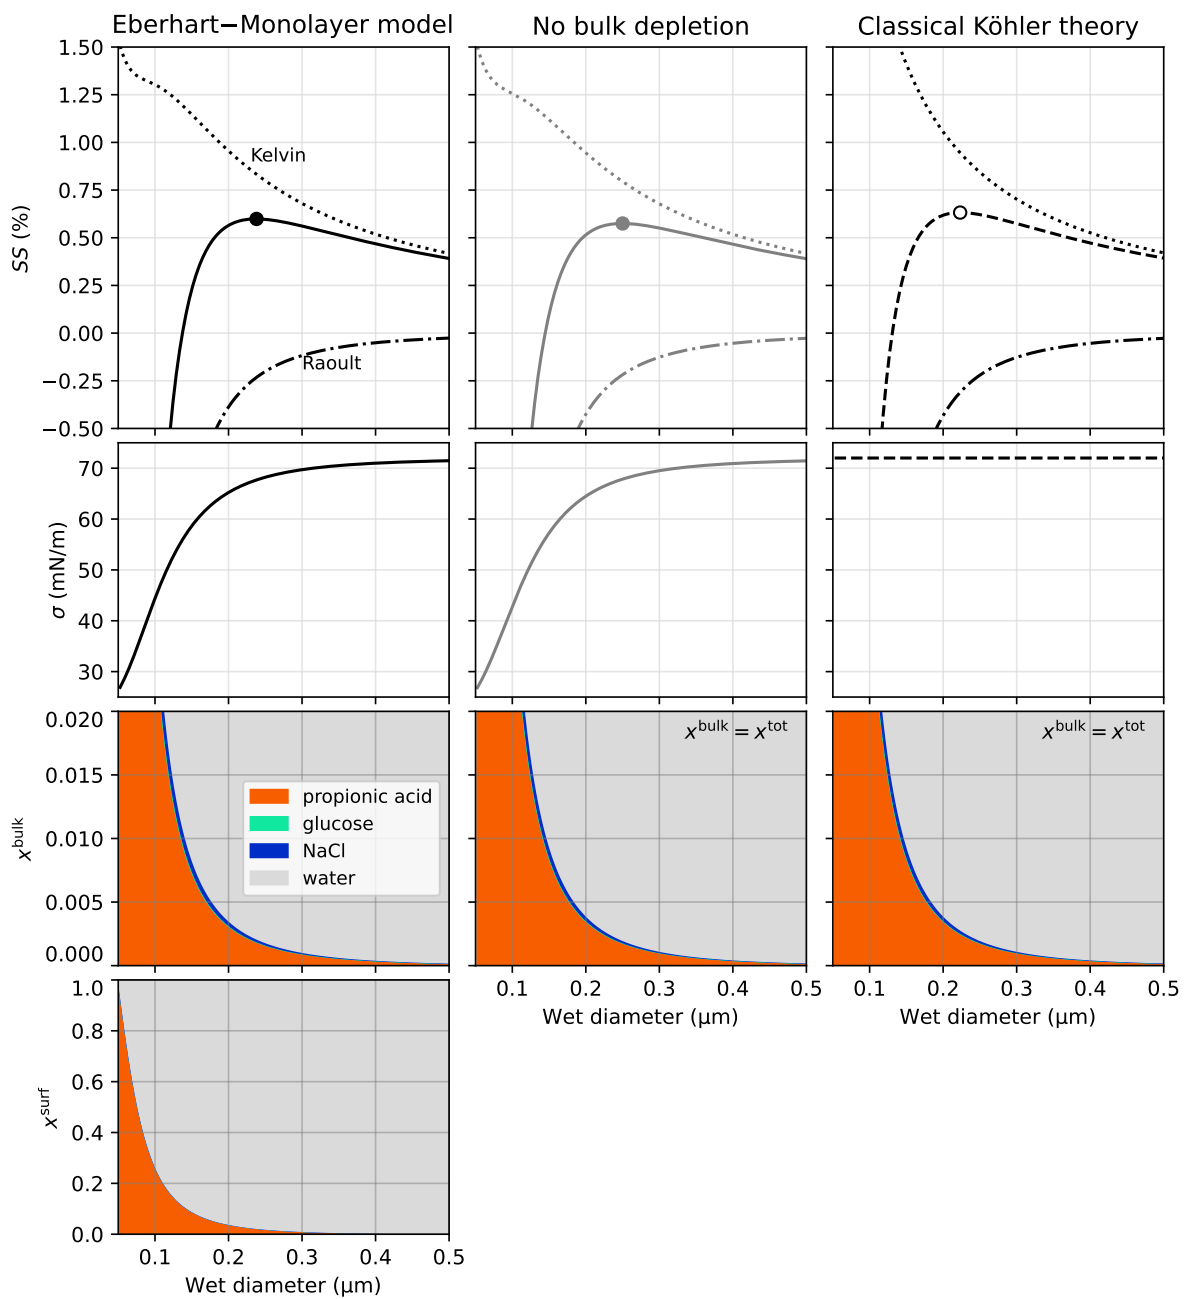

Figure S14: Same as Fig. 4 but using propionic acid instead of SDS.

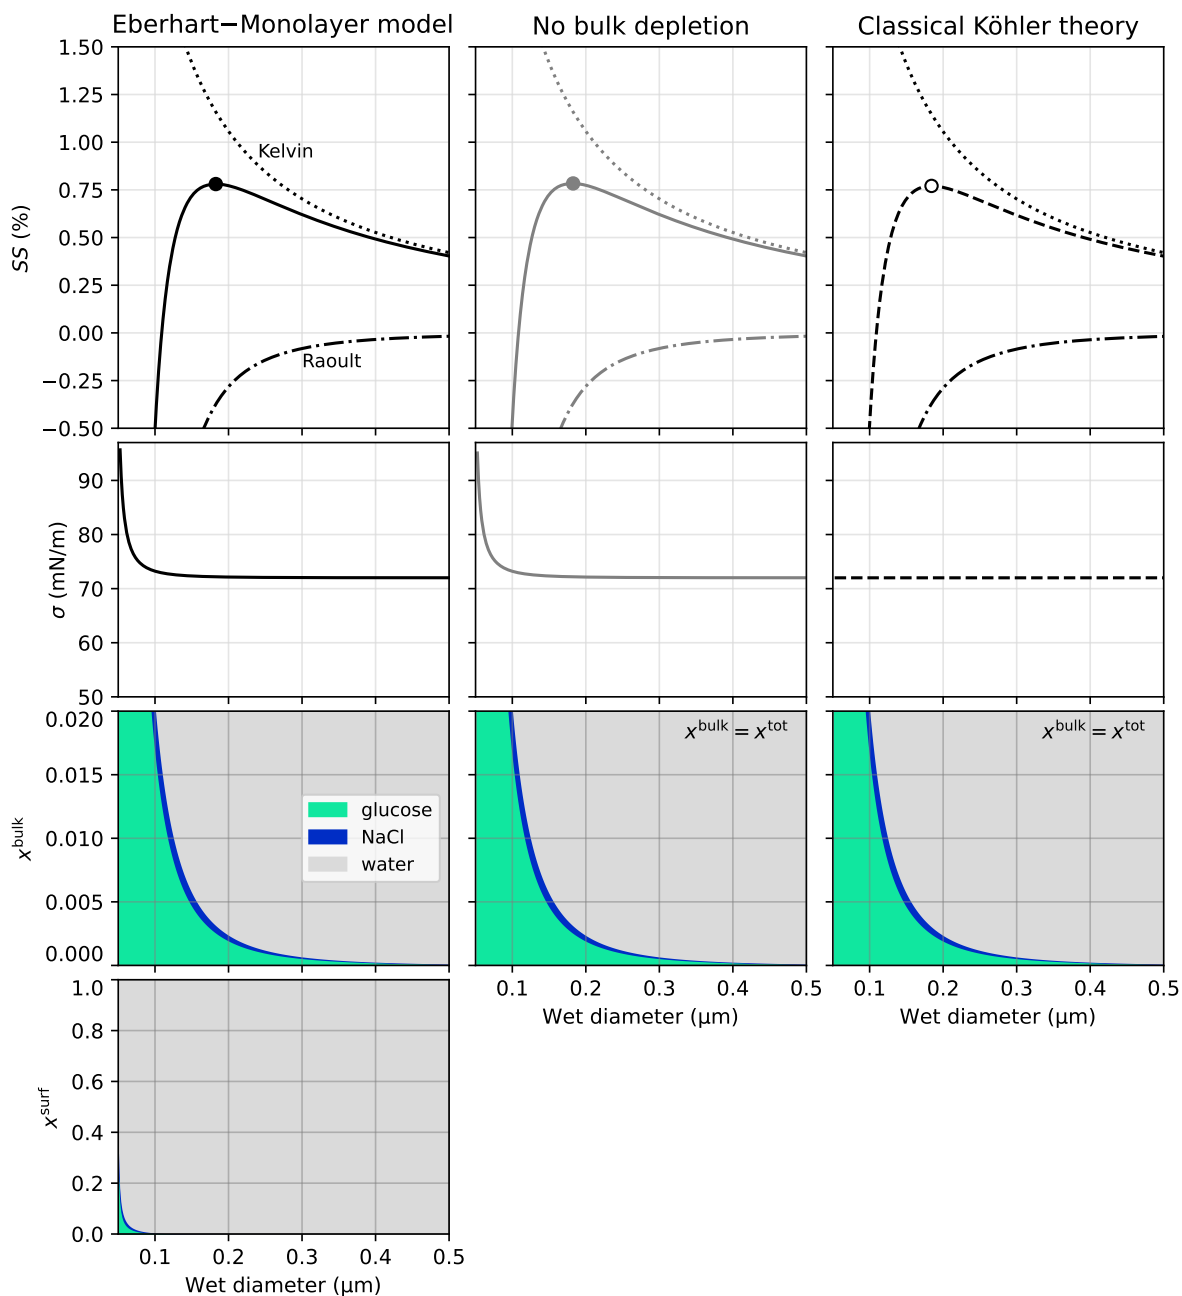

Figure S15: Köhler curves calculated with the Eberhart–Monolayer model, assuming no bulk depletion, and with Classical Köhler theory for a ternary glucose–NaCl–water particle (i.e.,  $w_{\text{glu}}/w_{\text{org}} = 1$ ) with  $D_{\text{dry}} = 50 \text{ nm}$  and  $w_{\text{org}} = 0.93$  (“med”). First row: Köhler curve (solid or dashed line) with Raoult (dash-dotted lines) and Kelvin effect (dotted lines) and critical supersaturation (circle). Second row: droplet surface tension. Third row: bulk composition (first column) and total composition (second and third column). The y-axis range was limited to 0–0.02 for a better visibility of the solute share. Fourth row: surface composition in the Eberhart–Monolayer model. For consistency with the previous plots, the y-axis range is kept here at 0–1. Since no partitioning is calculated in the second and third column, the surface composition is not determined and hence not shown here.

## S12 Variation of the surfactant

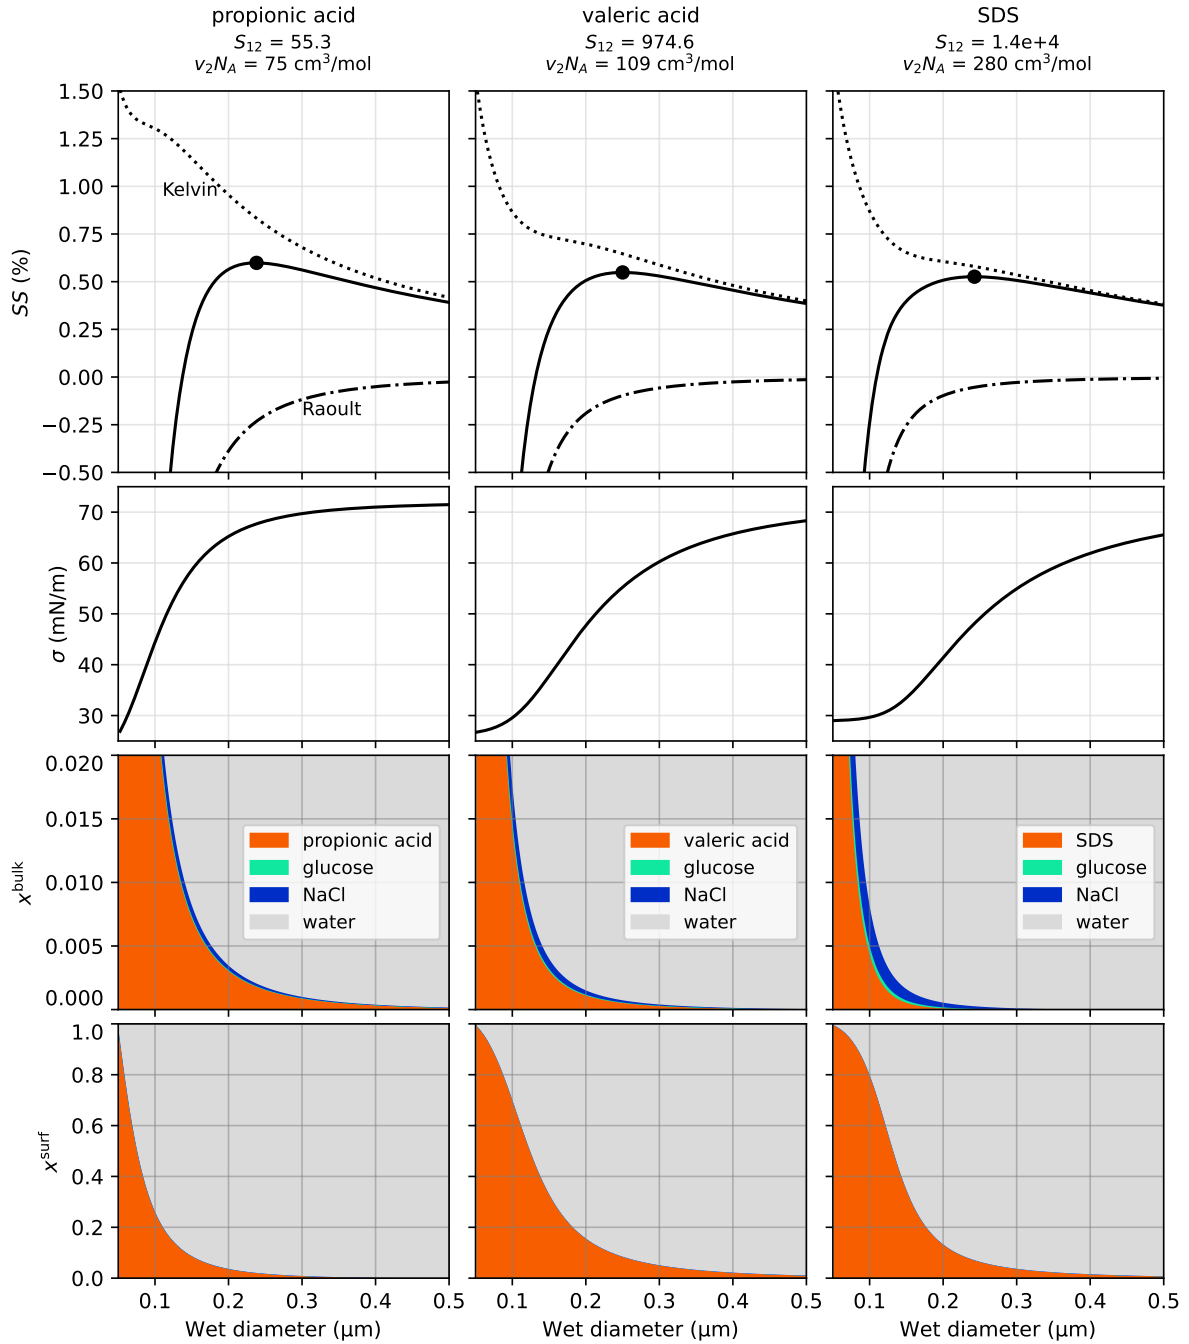

Figure S16: Köhler curves to illustrate the effect of molar volume  $v_2N_A$  on the Raoult effect and separation factor  $S_{12}$  on the Kelvin effect calculated with the Eberhart–Monolayer model for three different surfactants in a quaternary surfactant–glucose–NaCl–water particle ( $D_{\text{dry}} = 50 \text{ nm}$ ,  $w_{\text{org}} = 0.93$  ("med"), and  $w_{\text{glu}}/w_{\text{org}} = 0.05$ ). First row: Köhler curve (solid or dashed line) with Raoult (dash-dotted lines) and Kelvin effect (dotted lines) and critical supersaturation (circle), second row: droplet surface tension, third row: bulk composition, and fourth row: surface composition. The y-axis range in the third row was limited to 0–0.02 for a better visibility of the solute share.

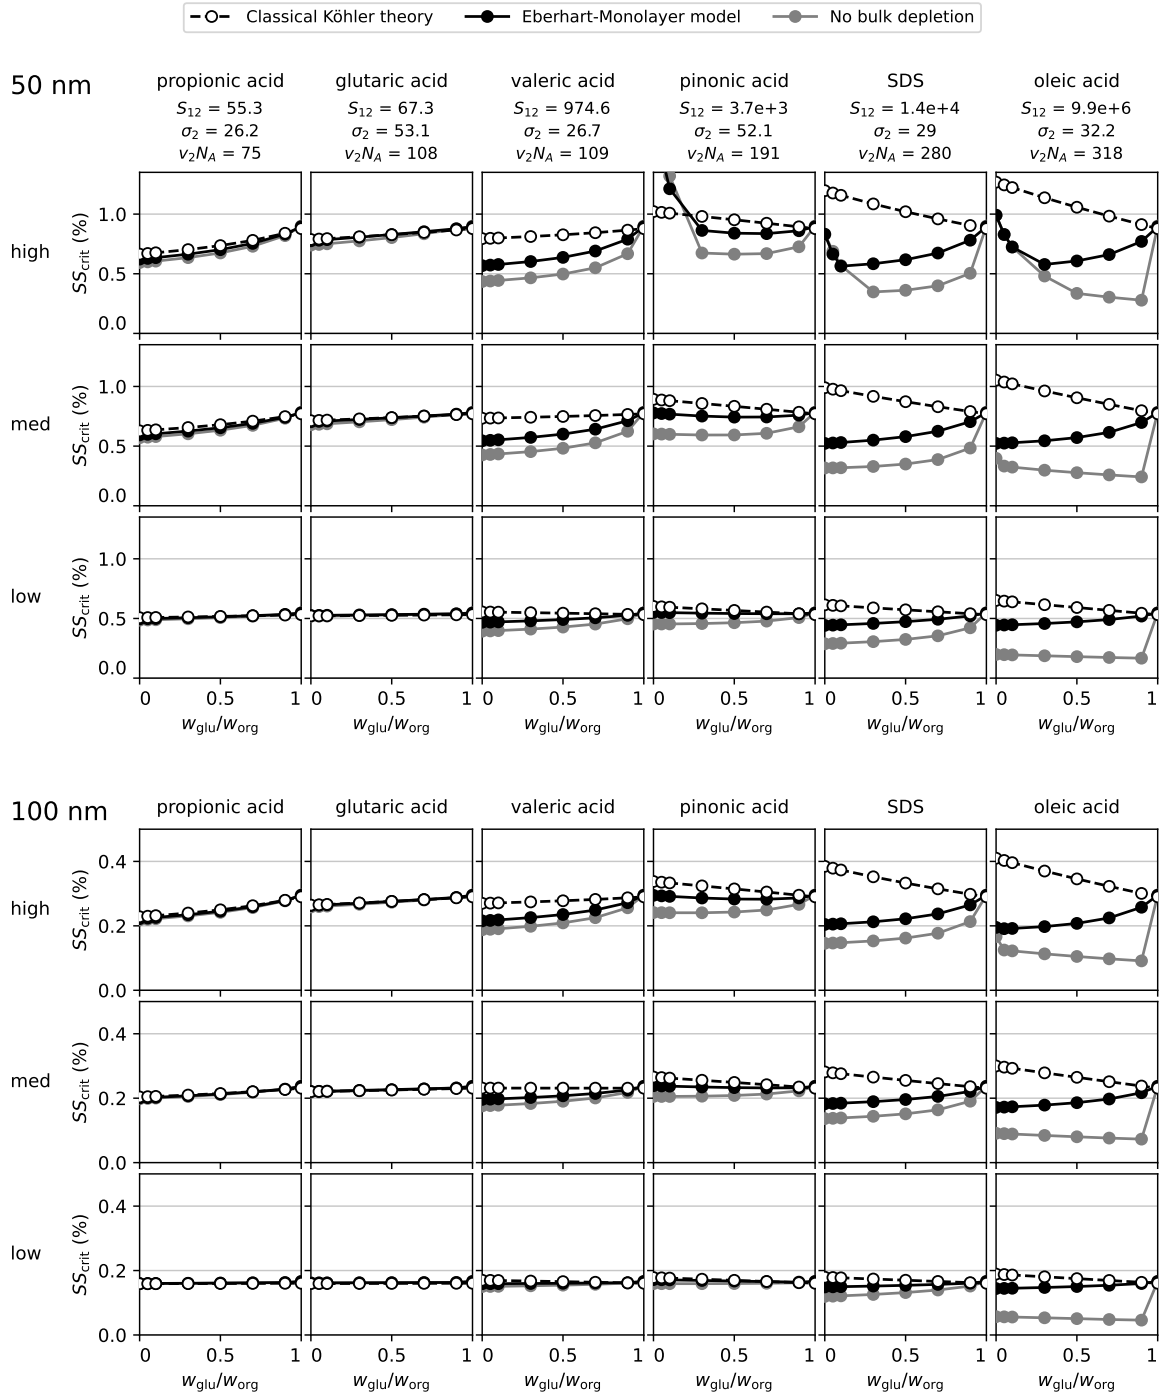

Figure S17: Combined influence of surfactant properties and the organic fraction on critical supersaturation for two different particle sizes. Upper panel:  $D_{\text{dry}} = 50$  nm. Lower panel:  $D_{\text{dry}} = 100$  nm. In the column title, the name of the surfactant, its binary separation factor in water  $S_{12}$ , its pure component surface tension in  $\text{mN m}^{-1}$ , and its molar volume in  $\text{cm}^3 \text{mol}^{-1}$  is given. The organic fraction  $w_{\text{org}}$  for each row can be found in Table 1. In some of the calculations with glutaric acid and propionic acid all curves overlap.

## S13 Influence of organic fraction on the critical activation diameter

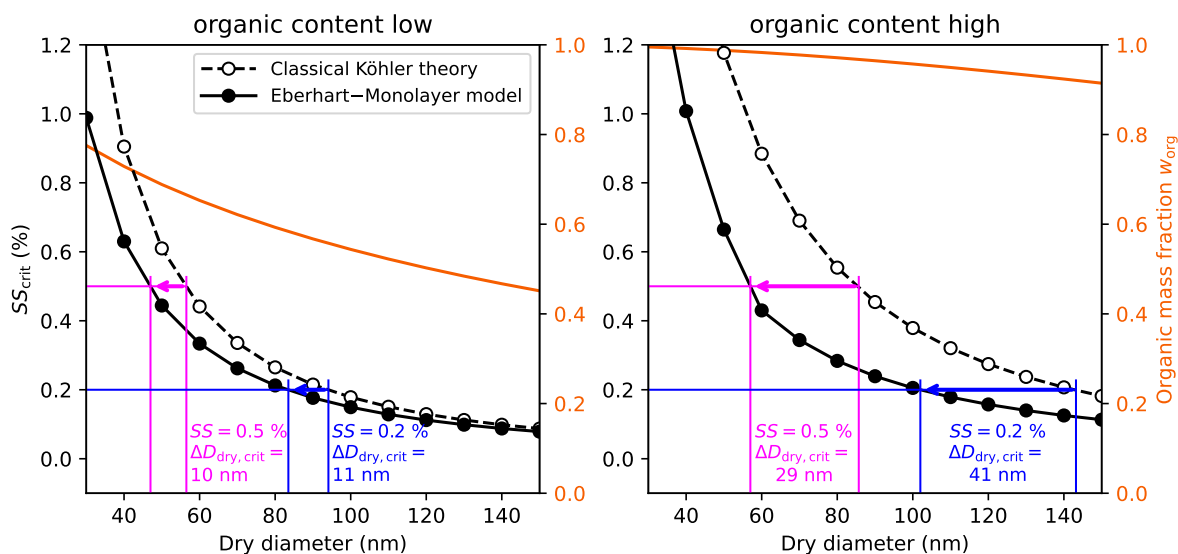

Figure S18: Same as Fig. 8 but with low organic content (left panel) and high organic content (right panel). The organic fraction is shown with an orange solid line on the right y-axis.

## References

- Alvarez, E., Vázquez, G., Sánchez-Vilas, M., Sanjurjo, B., and Navaza, J. M.: Surface Tension of Organic Acids + Water Binary Mixtures from 20 °C to 50 °C, *J. Chem. Eng. Data*, 42, 957–960, <https://doi.org/10.1021/je970025m>, 1997.
- Atrafi, A. and Pawlik, M.: Surface tension and gas dispersion properties of fatty acid solutions, *Minerals Engineering*, 85, 138–147, <https://doi.org/10.1016/j.mineng.2015.11.006>, 2016.
- Aumann, E., Hildemann, L., and Tabazadeh, A.: Measuring and modeling the composition and temperature-dependence of surface tension for organic solutions, *Atmospheric Environment*, 44, 329–337, <https://doi.org/10.1016/j.atmosenv.2009.10.033>, 2010.
- Bain, A., Ghosh, K., Prisle, N. L., and Bzdek, B. R.: Surface-Area-to-Volume Ratio Determines Surface Tensions in Microscopic, Surfactant-Containing Droplets, *ACS Central Science*, 9, 2076–2083, <https://doi.org/10.1021/acscentsci.3c00998>, 2023.
- Booth, A. M., Topping, D. O., McFiggans, G., and Percival, C. J.: Surface tension of mixed inorganic and dicarboxylic acid aqueous solutions at 298.15 K and their importance for cloud activation predictions, *Phys. Chem. Chem. Phys.*, 11, 8021–8028, <https://doi.org/10.1039/B906849J>, 2009.
- Boyer, H. C. and Dutcher, C. S.: Statistical Thermodynamic Model for Surface Tension of Aqueous Organic Acids with Consideration of Partial Dissociation, *The Journal of Physical Chemistry A*, 120, 4368–4375, <https://doi.org/10.1021/acs.jpca.6b01469>, pMID: 27219322, 2016.
- Boyer, H. C., Bzdek, B. R., Reid, J. P., and Dutcher, C. S.: Statistical Thermodynamic Model for Surface Tension of Organic and Inorganic Aqueous Mixtures, *The Journal of Physical Chemistry A*, 121, 198–205, <https://doi.org/10.1021/acs.jpca.6b10057>, pMID: 27933984, 2017.
- Bzdek, B. R., Power, R. M., Simpson, S. H., Reid, J. P., and Royall, C. P.: Precise, contactless measurements of the surface tension of picolitre aerosol droplets, *Chem. Sci.*, 7, 274–285, <https://doi.org/10.1039/C5SC03184B>, 2016.

- Chauhan, S., Sharma, V., and Sharma, K.: Maltodextrin–SDS interactions: Volumetric, viscometric and surface tension study, *Fluid Phase Equilibria*, 354, 236–244, <https://doi.org/10.1016/j.fluid.2013.06.051>, 2013.
- Ekström, S., Nozière, B., Hultberg, M., Alsberg, T., Magnér, J., Nilsson, E. D., and Artaxo, P.: A possible role of ground-based microorganisms on cloud formation in the atmosphere, *Biogeosciences*, 7, 387–394, <https://doi.org/10.5194/bg-7-387-2010>, 2010.
- El Haber, M., Ferronato, C., Giroir-Fendler, A., Fine, L., and Nozière, B.: Salting out, non-ideality and synergism enhance surfactant efficiency in atmospheric aerosols, *Scientific Reports*, 13, 20672, <https://doi.org/10.1038/s41598-023-48040-5>, 2023.
- El Haber, M., Gérard, V., Kleinheins, J., Ferronato, C., and Nozière, B.: Measuring the Surface Tension of Atmospheric Particles and Relevant Mixtures to Better Understand Key Atmospheric Processes, *Chem. Rev.*, 124, 10924–10963, <https://doi.org/10.1021/acs.chemrev.4c00173>, 2024.
- Gaman, A. I., Kulmala, M., Vehkamäki, H., Napari, I., Mircea, M., Facchini, M. C., and Laaksonen, A.: Binary homogeneous nucleation in water–succinic acid and water–glutaric acid systems, *The Journal of Chemical Physics*, 120, 282–291, <https://doi.org/10.1063/1.1630564>, 2004.
- Granados, K., Gracia-Fadrique, J., Amigo, A., and Bravo, R.: Refractive Index, Surface Tension, and Density of Aqueous Mixtures of Carboxylic Acids at 298.15 K, *Journal of Chemical & Engineering Data*, 51, 1356–1360, <https://doi.org/10.1021/je060084c>, 2006.
- Gérard, V., Nozière, B., Baduel, C., Fine, L., Frossard, A. A., and Cohen, R. C.: Anionic, Cationic, and Nonionic Surfactants in Atmospheric Aerosols from the Baltic Coast at Askö, Sweden: Implications for Cloud Droplet Activation, *Environmental Science & Technology*, 50, 2974–2982, <https://doi.org/10.1021/acs.est.5b05809>, 2016.
- Hyvärinen, A.-P., Lihavainen, H., Gaman, A., Vairila, L., Ojala, H., Kulmala, M., and Viisanen, Y.: Surface Tensions and Densities of Oxalic, Malonic, Succinic, Maleic, Malic, and cis-Pinonic Acids, *Journal of Chemical & Engineering Data*, 51, 255–260, <https://doi.org/10.1021/je050366x>, 2006.
- Kleinheins, J., Shardt, N., El Haber, M., Ferronato, C., Nozière, B., Peter, T., and Marcolli, C.: Surface tension models for binary aqueous solutions: a review and intercomparison, *Phys. Chem. Chem. Phys.*, 25, 11055–11074, <https://doi.org/10.1039/D3CP00322A>, 2023.
- Lee, J. Y. and Hildemann, L. M.: Surface tension of solutions containing dicarboxylic acids with ammonium sulfate, d-glucose, or humic acid, *Journal of Aerosol Science*, 64, 94–102, <https://doi.org/10.1016/j.jaerosci.2013.06.004>, 2013.
- Lee, J. Y. and Hildemann, L. M.: Surface tensions of solutions containing dicarboxylic acid mixtures, *Atmospheric Environment*, 89, 260–267, <https://doi.org/10.1016/j.atmosenv.2014.02.049>, 2014.
- Lunkenheimer, K., Barzyk, W., Hirte, R., and Rudert, R.: Adsorption Properties of Soluble, Surface-Chemically Pure n-Alkanoic Acids at the Air/Water Interface and the Relationship to Insoluble Monolayer and Crystal Structure Properties, *Langmuir*, 19, 6140–6150, <https://doi.org/10.1021/la034379p>, 2003.
- Matijević, E. and Pethica, B. A.: The properties of ionized monolayers. Part 1.—Sodium dodecyl sulphate at the air/water interface, *Trans. Faraday Soc.*, 54, 1382–1389, <https://doi.org/10.1039/TF9585401382>, 1958.
- Persson, C., Jonsson, A., Bergström, M., and Eriksson, J. C.: Testing the Gouy–Chapman theory by means of surface tension measurements for SDS–NaCl–H<sub>2</sub>O mixtures, *Journal of Colloid and Interface Science*, 267, 151–154, [https://doi.org/10.1016/S0021-9797\(03\)00761-6](https://doi.org/10.1016/S0021-9797(03)00761-6), 2003.
- Petkova, B., Tcholakova, S., Chenkova, M., Golemanov, K., Denkov, N., Thorley, D., and Stoyanov, S.: Foamability of aqueous solutions: Role of surfactant type and concentration, *Advances in Colloid and Interface Science*, 276, 102084, <https://doi.org/10.1016/j.cis.2019.102084>, 2020.
- Prisle, N. L., Raatikainen, T., Laaksonen, A., and Bilde, M.: Surfactants in cloud droplet activation: mixed organic-inorganic particles, *Atmospheric Chemistry and Physics*, 10, 5663–5683, <https://doi.org/10.5194/acp-10-5663-2010>, 2010.

- Pugh, R. and Stenius, P.: Solution chemistry studies and flotation behaviour of apatite, calcite and fluorite minerals with sodium oleate collector, *International Journal of Mineral Processing*, 15, 193–218, [https://doi.org/10.1016/0301-7516\(85\)90035-3](https://doi.org/10.1016/0301-7516(85)90035-3), 1985.
- Romero, C. M. and Albis, A.: Influence of Polyols and Glucose on the Surface Tension of Bovine alpha-Lactalbumin in Aqueous Solution, *Journal of Solution Chemistry*, 39, 1865–1876, <https://doi.org/10.1007/s10953-010-9554-5>, 2010.
- Shulman, M. L., Jacobson, M. C., Carlson, R. J., Synovec, R. E., and Young, T. E.: Dissolution behavior and surface tension effects of organic compounds in nucleating cloud droplets, *Geophysical Research Letters*, 23, 277–280, <https://doi.org/10.1029/95GL03810>, 1996.
- Sorjamaa, R., Svenningsson, B., Raatikainen, T., Henning, S., Bilde, M., and Laaksonen, A.: The role of surfactants in Köhler theory reconsidered, *Atmospheric Chemistry and Physics*, 4, 2107–2117, <https://doi.org/10.5194/acp-4-2107-2004>, 2004.
- Suárez, F. and Romero, C. M.: Apparent Molar Volume and Surface Tension of Dilute Aqueous Solutions of Carboxylic Acids, *Journal of Chemical & Engineering Data*, 56, 1778–1786, <https://doi.org/10.1021/je1002829>, 2011.
- Theander, K. and Pugh, R. J.: The Influence of pH and Temperature on the Equilibrium and Dynamic Surface Tension of Aqueous Solutions of Sodium Oleate, *Journal of Colloid and Interface Science*, 239, 209–216, <https://doi.org/10.1006/jcis.2000.7543>, 2001.
- Topping, D. O., McFiggans, G. B., Kiss, G., Varga, Z., Facchini, M. C., Decesari, S., and Mircea, M.: Surface tensions of multi-component mixed inorganic/organic aqueous systems of atmospheric significance: measurements, model predictions and importance for cloud activation predictions, *Atmospheric Chemistry and Physics*, 7, 2371–2398, <https://doi.org/10.5194/acp-7-2371-2007>, 2007.
- Tuckermann, R.: Surface tension of aqueous solutions of water-soluble organic and inorganic compounds, *Atmospheric Environment*, 41, 6265–6275, <https://doi.org/10.1016/j.atmosenv.2007.03.051>, 2007.
- Tuckermann, R. and Cammenga, H. K.: The surface tension of aqueous solutions of some atmospheric water-soluble organic compounds, *Atmospheric Environment*, 38, 6135–6138, <https://doi.org/10.1016/j.atmosenv.2004.08.005>, 2004.
- Varga, Z., Kiss, G., and Hansson, H.-C.: Modelling the cloud condensation nucleus activity of organic acids on the basis of surface tension and osmolality measurements, *Atmospheric Chemistry and Physics*, 7, 4601–4611, <https://doi.org/10.5194/acp-7-4601-2007>, 2007.
- Yehia, A., El-Halim, S. A., Sharada, H., Khalek, M. A., and Ammar, M.: Interactions of Cellulase and Oleic Acid Solution Mixtures, *Tenside Surfactants Detergents*, 53, 176–181, <https://doi.org/10.3139/113.110423>, 2016.
- Zdziennicka, A., Szymczyk, K., Krawczyk, J., and Jańczuk, B.: Activity and thermodynamic parameters of some surfactants adsorption at the water–air interface, *Fluid Phase Equilibria*, 318, 25–33, <https://doi.org/10.1016/j.fluid.2012.01.014>, 2012.
